# Supplementary material for: Total synthesis of antillatoxin
Source: Royal Society of Chemistry journal article supplement (doi:10.1039/b608193m), 2006-01-01
Supplement: b608193m.pdf [file b608193m.pdf]

## **Total synthesis of antillatoxin**

Kiew-Ching Lee and Teck-Peng Loh\*

*Division of Chemistry and Biological Chemistry,  
Nanyang Technological University,  
Singapore 637616*

### **Supporting information:**

#### **Experimental Section**

##### **General:**

THF was distilled from sodium/benzophenone. Hexane and dichloromethane were distilled from CaH<sub>2</sub>. TLC was carried out with pre-coated Merck 60 F<sub>254</sub> plates. Silica gel 60 (Merck, 400-630 mesh) was used for column chromatography. Infrared spectra were recorded on a Bio-Rad FTS 165 FTIR spectrometer. Liquid samples were examined as film between NaCl salt plates. <sup>1</sup>H and <sup>13</sup>C NMR spectra were taken in CDCl<sub>3</sub> on Bruker DPX300 and Bruker AMX500 and referenced to internal tetramethylsilane (SiMe<sub>4</sub>). Chemical shifts for <sup>1</sup>H NMR spectra are reported as δ in units of parts per million (ppm) downfield from SiMe<sub>4</sub> (δ 0.0) and relative to the signal of chloroform-d (δ 7.2600, singlet). Multiplicities were given as: s (singlet); brs (broad singlet); d (doublet); t (triplet); q (quartet); dd (doublets of doublet); dt (doublets of triplet); dtq (doublets of triplets of quartet); or m (multiplets). The number of protons (n) for a given resonance is indicated by nH. Coupling constants are reported as a *J* value in Hz. Carbon nuclear magnetic resonance spectra (<sup>13</sup>C NMR) are reported as δ in units of parts per million (ppm) downfield from SiMe<sub>4</sub> (δ 0.0) and relative to the signal of chloroform-d (δ 77, triplet).

Mass spectral analyses were carried out on a VG 7035 micromass mass spectrophotometer at a source temperature of 200 °C and at an ion current of 70 eV. Mass spectral data were reported in units of mass to charge (m/z) and % intensity.

**(E)-methyl 2,4,4-trimethylpent-2-enoate**

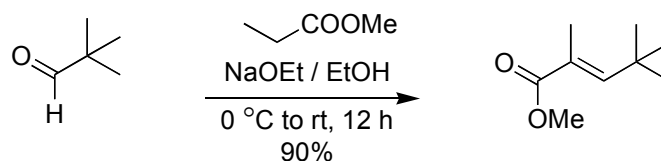

To a mixture of methyl propionate (24.1 mL, 0.25 mol) and sodium sand (1.45 g, 0.063 mol) at 0 °C was added catalytic amount of absolute ethanol (0.4 mL). trimethylacetaldehyde (4.3 g, 5.43 mL, 50 mmol) was added dropwise. The reaction mixture was stirred at 0 °C to room temperature for 12 h. After the reaction was completed, the reaction mixture was poured into saturated NH<sub>4</sub>Cl and extracted with ether (x3). The combined organic extracts washed with brine, dried over MgSO<sub>4</sub> and concentrated. The residue was purified by flash chromatography on silica gel, elution with hexane/ethyl acetate, 20:1, to afford the pure product (7.78 g, 90%) as a yellowish oil.

**R<sub>f</sub>** 0.78 (hexane/ethyl acetate, 4:1);

**<sup>1</sup>H NMR (300 MHz, CDCl<sub>3</sub>):** δ 1.18 (9H, s, -C(CH<sub>3</sub>)<sub>3</sub>), 1.95 (3H, d, *J* = 1.4 Hz, -CH<sub>3</sub>), 3.72 (3H, s, -OCH<sub>3</sub>), 6.80 (1H, q, *J* = 1.4 Hz, -CH=C-) ppm;

**<sup>13</sup>C NMR (75 MHz, CDCl<sub>3</sub>):** δ 13.3 (-CH=C-CH<sub>3</sub>), 30.1 (-C(CH<sub>3</sub>)<sub>3</sub>), 33.0 (-C(CH<sub>3</sub>)<sub>3</sub>), 51.8 (-OMe), 126.4 (-CH=C-), 151.5 (-CH=C-), 169.8 (-CO<sub>2</sub>Me) ppm;

**IR (neat, cm<sup>-1</sup>):** 2959, 2870, 1716, 1639, 1466, 1436, 1365, 1284, 1251;

**HRMS (EI) m/z (M<sup>+</sup>):** obsd 156.1157, calcd 156.1150 for C<sub>9</sub>H<sub>16</sub>O<sub>2</sub>.

**(E)-2,4,4-trimethylpent-2-en-1-ol**

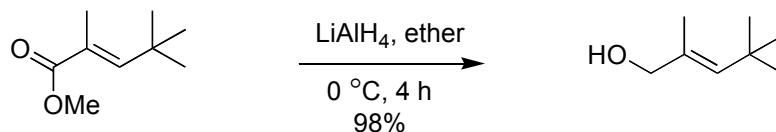

To a mixture of LiAlH<sub>4</sub> (0.4 g, 10.5 mmol) in anhydrous ether (20 mL) at 0 °C was added ester (1.56 g, 10 mmol) in ether (10 mL) dropwise. The reaction mixture was stirred at 0 °C and the reaction progress was monitored by TLC. After completion, the reaction mixture was quenched with saturated Na<sub>2</sub>SO<sub>4</sub> at 0 °C until white precipitate was deposited. The mixture was filtered, washed with ether and dried over MgSO<sub>4</sub> and concentrated in *vacuo*. The residue was purified by flash chromatography on silica gel, eluting with hexane/ethyl acetate (10:1) to afforded product (1.28 g, 98%) as a colorless oil.

$R_f$  0.47 (hexane/ethyl acetate, 4:1);

$^1\text{H NMR}$  (300 MHz,  $\text{CDCl}_3$ ):  $\delta$  1.12 (9H, s,  $-\text{C}(\text{CH}_3)_3$ ), 1.78 (3H, d,  $J = 1.2$  Hz,  $-\text{C}-\text{CH}_3$ ), 3.92 (2H, s,  $-\text{CH}_2-\text{OH}$ ), 5.42 (1H, q,  $J = 1.2$  Hz,  $-\text{CH}=\text{C}-$ ) ppm;

$^{13}\text{C NMR}$  (75 MHz,  $\text{CDCl}_3$ ):  $\delta$  14.7 ( $-\text{CH}=\text{C}-\text{CH}_3$ ), 30.9 ( $-\text{C}(\text{CH}_3)_3$ ), 32.2 ( $-\text{C}(\text{CH}_3)_3$ ), 70.8 ( $-\text{CH}_2\text{OH}$ ), 133.3 ( $-\text{CH}=\text{C}-$ ), 136.6 ( $-\text{CH}=\text{C}-$ ) ppm;

$\text{IR}$  (neat  $\text{cm}^{-1}$ ): 3331, 2957, 2867, 1657, 1465, 1363;

$\text{HRMS}$  (EI)  $m/z$  ( $\text{M}^+$ ): obsd 128.1196, calcd 128.1201 for  $\text{C}_8\text{H}_{13}\text{O}$ .

### (*E*)-2,4,4-trimethylpent-2-enal

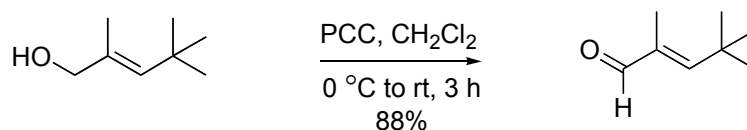

To a mixture of PCC (6.47 g, 30 mmol), 4Å molecular sieve powder (3 g) and silica gel (3 g) in anhydrous  $\text{CH}_2\text{Cl}_2$  (30 mL) at 0 °C was added alcohol (1.28 g, 10.1 mmol) prediluted in anhydrous  $\text{CH}_2\text{Cl}_2$  (5 mL). The reaction mixture was stirred for 3 h. After completion (monitored by TLC), the reaction mixture was filtered through silica gel to afford the product (1.1 g, 88%) as a yellowish oil.

$R_f$  0.75 (hexane/ethyl acetate, 4:1);

$^1\text{H NMR}$  (300 MHz,  $\text{CDCl}_3$ ):  $\delta$  1.24 (9H, s,  $-\text{C}(\text{CH}_3)_3$ ), 1.86 (3H, d,  $J = 1.3$  Hz,  $-\text{C}-\text{CH}_3$ ), 6.40 (1H, d,  $J = 1.3$  Hz,  $-\text{CH}=\text{C}-$ ), 9.30 (1H, s,  $-\text{CHO}$ ) ppm;

$^{13}\text{C NMR}$  (75 MHz,  $\text{CDCl}_3$ ):  $\delta$  9.8 ( $-\text{CH}=\text{C}-\text{CH}_3$ ), 29.7 ( $-\text{C}(\text{CH}_3)_3$ ), 34.2 ( $-\text{C}(\text{CH}_3)_3$ ), 123.8 ( $-\text{CH}=\text{C}-$ ), 138.5 ( $-\text{CH}=\text{C}-$ ), 196.8 ( $-\text{CHO}$ ) ppm;

$\text{IR}$  (neat,  $\text{cm}^{-1}$ ): 2961, 2869, 1691, 1643, 1467, 1366, 1231;

$\text{HRMS}$  (EI)  $m/z$  ( $\text{M}^+$ ): obsd 126.1020, calcd 126.1044 for  $\text{C}_8\text{H}_{14}\text{O}$ .

### (2*E*,4*E*)-methyl 2,4,6,6-tetramethylhepta-2,4-dienoate

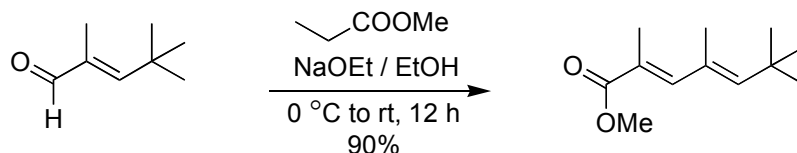

To a mixture of methyl propionate (72.3 mL, 0.25 mol) and sodium sand (0.9 g, 39 mmol) at 0 °C was added catalytic amount of absolute ethanol (0.3 mL). Subsequently, aldehyde (3.84 g, 30 mmol) was added dropwise. The reaction mixture was stirred for 12 h. After completion the reaction mixture was poured into sat.

NH<sub>4</sub>Cl at 0 °C and extracted with ether. The combined etherates was washed with brine, dried over anhydrous MgSO<sub>4</sub> and concentrated in *vacuo*. The residue was purified by flash chromatography on silica gel to afford product (5.3 g, 90%) as a yellowish oil.

**R<sub>f</sub>** 0.78 (hexane/ethyl acetate, 4:1);

**<sup>1</sup>H NMR (300 MHz, CDCl<sub>3</sub>):** δ 1.16 (9H, s, -C(CH<sub>3</sub>)<sub>3</sub>), 1.91 (3H, d, *J* = 1.3 Hz, -CH=C-CH<sub>3</sub>), 1.97 (3H, d, *J* = 1.3 Hz, -CH=C-CH<sub>3</sub>), 3.74 (3H, s, -COOCH<sub>3</sub>), 5.56 (1H, s, -CH=C-), 7.08 (1H, s, -CH=C-) ppm;

**<sup>13</sup>C NMR (75 MHz, CDCl<sub>3</sub>):** δ 13.9 (-CH=C-CH<sub>3</sub>), 17.3 (-CH=C-CH<sub>3</sub>), 30.7 (-C(CH<sub>3</sub>)<sub>3</sub>), 33.0 (-C(CH<sub>3</sub>)<sub>3</sub>), 51.8 (-OMe), 124.9 (-CH=C-), 130.8 (-CH=C-), 145.3 (-CH=C-), 145.5 (-CH=C-), 169.7 (-CO<sub>2</sub>Me) ppm;

**IR (neat, cm<sup>-1</sup>):** 2956, 2888, 1713, 1625, 1465, 1435, 1386, 1363;

**HRMS (EI) m/z (M<sup>+</sup>):** obsd 196.1457, calcd 196.1463 for C<sub>12</sub>H<sub>20</sub>O<sub>2</sub>.

#### (2E,4E)-2,4,6,6-tetramethylhepta-2,4-dien-1-ol

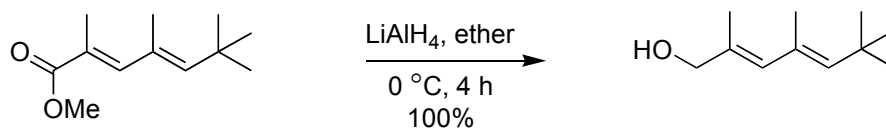

To a mixture of LiAlH<sub>4</sub> (0.8 g, 21 mmol) in anhydrous ether (30 mL) at 0 °C was added ester (2.52 g, 12 mmol) in ether (30 mL) dropwise. The reaction mixture was stirred at 0 °C and the reaction progress was monitored by TLC. After completion, the reaction mixture was quenched with saturated Na<sub>2</sub>SO<sub>4</sub> at 0 °C until white precipitate was deposited. The mixture was filtered, washed with ether and dried over MgSO<sub>4</sub> and concentrated in *vacuo*. The residue was purified by flash chromatography on silica gel, eluting with hexane/ethyl acetate (10:1) to afford the alcohol (2.02 g (100%)) as a colorless oil.

**R<sub>f</sub>** 0.44 (hexane/ethyl acetate, 4:1);

**<sup>1</sup>H NMR (300 MHz, CDCl<sub>3</sub>):** δ 1.15 (9H, s, -C(CH<sub>3</sub>)<sub>3</sub>), 1.79 (3H, d, *J* = 1.35 Hz, -C-CH<sub>3</sub>), 1.83 (3H, d, *J* = 1.35 Hz, -C-CH<sub>3</sub>), 4.03 (2H, s, -CH<sub>2</sub>-OH), 5.33 (1H, brs, -CH=C-), 5.85 (1H, brs, -CH=C-) ppm;

**<sup>13</sup>C NMR (75 MHz, CDCl<sub>3</sub>):** δ 15.2 (-CH=C-CH<sub>3</sub>), 17.9 (-CH=C-CH<sub>3</sub>), 31.0 (-C(CH<sub>3</sub>)<sub>3</sub>), 32.6 (-C(CH<sub>3</sub>)<sub>3</sub>), 69.5 (-CH<sub>2</sub>OH), 130.9 (-CH=C-), 131.5 (-CH=C-), 133.8 (-CH=C-), 140.6 (-CH=C-) ppm;

IR (neat  $\text{cm}^{-1}$ ): 3332, 2956, 1645, 1465, 1362;

HRMS (EI)  $m/z$  ( $M^+$ ): obsd 168.1516, calcd 168.1514 for  $\text{C}_{11}\text{H}_{20}\text{O}$ .

**(2E,4E)-2,4,6,6-tetramethylhepta-2,4-dienal (7)**

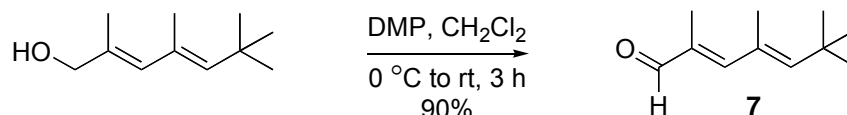

To a solution of Dess-Martin reagent (8.66 g, 20.4 mmol) in anhydrous  $\text{CH}_2\text{Cl}_2$  (40 mL) was added dropwise alcohol (2.86 g, 17 mmol) prediluted in  $\text{CH}_2\text{Cl}_2$  (20 mL) at 0 °C. The reaction mixture was stirred under nitrogen at 0 °C for 3 h. After completion, the reaction mixture was diluted with ether and poured slowly into a  $\text{Na}_2\text{S}_2\text{O}_3$  :  $\text{NaHCO}_3$  (1:1) solution and stirred for 10 minutes and extracted with ether. The combine etherate layer was washed with  $\text{NaHCO}_3$ , brine and dried over anhydrous  $\text{MgSO}_4$ . Solvent was removed by concentration in *vacuo*. The residue was purified by flash chromatography on silica gel to provide aldehyde (2.54 g, 90%) as a yellowish oil.

$R_f$  0.78 (hexane/ethyl acetate, 4:1);

$^1\text{H NMR}$  (300 MHz,  $\text{CDCl}_3$ ):  $\delta$  1.20 (9H, s,  $-\text{C}(\text{CH}_3)_3$ ), 1.93 (3H, d,  $J = 1.3$  Hz,  $-\text{C}-\text{CH}_3$ ), 2.05 (3H, d,  $J = 1.3$  Hz,  $-\text{C}-\text{CH}_3$ ), 5.85 (1H, brs,  $-\text{CH}=\text{C}-$ ), 6.68 (1H, brs,  $-\text{CH}=\text{C}-$ ), 9.37 (1H, s,  $-\text{CHO}$ ) ppm;

$^{13}\text{C NMR}$  (75 MHz,  $\text{CDCl}_3$ ):  $\delta$  10.7 ( $-\text{CH}=\text{C}-\text{CH}_3$ ), 17.1 ( $-\text{CH}=\text{C}-\text{CH}_3$ ), 30.6 ( $-\text{C}(\text{CH}_3)_3$ ), 33.3 ( $-\text{C}(\text{CH}_3)_3$ ), 132.0 ( $-\text{CH}=\text{C}-$ ), 135.4 ( $-\text{CH}=\text{C}-$ ), 150.2 ( $-\text{CH}=\text{C}-$ ), 157.3 ( $-\text{CH}=\text{C}-$ ), 196.3 ( $-\text{CHO}$ ) ppm;

IR (neat,  $\text{cm}^{-1}$ ): 2959, 2868, 1727, 1683, 1609, 1466, 1364;

HRMS (EI)  $m/z$  ( $M^+$ ): obsd 166.1368, calcd 166.1358 for  $\text{C}_{11}\text{H}_{18}\text{O}$ .

**Methyl 3-hydroxy-2-methylenebutanoate**

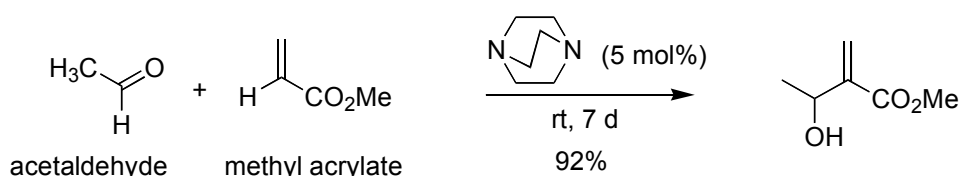

To a mixture of methyl acrylate (50 mL, 0.556 mol) and acetaldehyde (47 mL, 0.832 mol) was added 5% mol of DABCO (3.12 g, 0.027 mol). The reaction mixture was stirred at room temperature for 7 d. After completion,  $\text{CH}_2\text{Cl}_2$  was added and the

mixture was treated with 1M HCl, *sat.* NaHCO<sub>3</sub> solution, brine, dried over anhydrous MgSO<sub>4</sub> and concentrated in *vacuo*. Purification through flash column chromatography with 10 % ethyl acetate in hexane to afford the product (66.6 g, 92%) as a colorless oil.

*R<sub>f</sub>* 0.31 (hexane/ethyl acetate, 4:1);

<sup>1</sup>H NMR (300 MHz, CDCl<sub>3</sub>): δ 1.38 (3H, d, *J* = 6.5 Hz, -CH-CH<sub>3</sub>), 2.82 (1H, brs, -OH), 3.79 (3H, s, -COOCH<sub>3</sub>), 4.61 (1H, q, *J* = 6.5 Hz, -CH-OH), 5.84 (1H, d, *J* = 0.55 Hz, -C=CH<sub>2</sub>), 6.22 (1H, d, *J* = 0.55 Hz, -C=CH<sub>2</sub>) ppm;

<sup>13</sup>C NMR (75 MHz, CDCl<sub>3</sub>): δ 22.1 (-CH-CH<sub>3</sub>), 51.9 (-CO<sub>2</sub>Me), 67.1 (-CHOH), 124.2 (-C=CH<sub>2</sub>), 143.5 (-C=CH<sub>2</sub>), 167.1 (-CO<sub>2</sub>Me) ppm;

IR (neat, cm<sup>-1</sup>): 3426, 2978, 1713, 1630, 1440, 1368;

HRMS (EI) *m/z* (M<sup>+</sup>) : obsd 130.0628, calcd 130.0630 for C<sub>6</sub>H<sub>10</sub>O<sub>3</sub>.

#### (*Z*)-methyl 2-(bromomethyl)but-2-enoate (**8**)

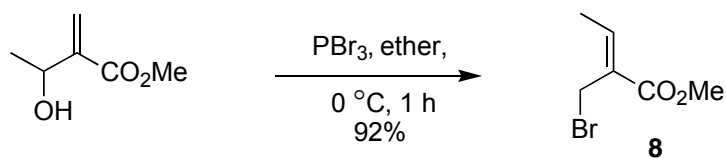

To a solution of alcohol (26 g, 0.2 mol) in anhydrous ether (100 mL) at 0 °C was added phosphorus tribromide (19 mL, 0.2 mol) dropwise. The mixture was stirred at 0 °C for 1 h. After the reaction completed (monitored by TLC), the mixture was poured into ice water. The solution was extracted with ether and the combined etherate was washed with *sat.* NaHCO<sub>3</sub> solution, brine, dried over anhydrous MgSO<sub>4</sub> and concentrated in *vacuo*. The residue was purified by flash chromatography to afford the bromide **8** (35.4 g, 92%) as a colorless oil.

*R<sub>f</sub>* 0.70 (hexane/ethyl acetate, 4:1);

<sup>1</sup>H NMR (300 MHz, CDCl<sub>3</sub>): δ 1.92 (3H, d, *J* = 7.25 Hz, -CH-CH<sub>3</sub>), 3.80 (3H, s, -COOCH<sub>3</sub>), 4.24 (2H, s, -CH<sub>2</sub>-Br), 7.06 (1H, q, *J* = 7.25 Hz, -CH=C-) ppm;

<sup>13</sup>C NMR (75 MHz, CDCl<sub>3</sub>): δ 14.5 (-CH-CH<sub>3</sub>), 24.0 (-CH<sub>2</sub>Br), 52.1 (-CO<sub>2</sub>Me), 130.3 (-C=CH-), 143.4 (-C=CH-), 166.0 (-CO<sub>2</sub>Me) ppm;

IR (neat, cm<sup>-1</sup>): 2991, 2952, 1716, 1645, 1382;

HRMS (EI) *m/z* (M<sup>+</sup>): obsd 191.9814, calcd 191.9786 for C<sub>6</sub>H<sub>9</sub><sup>79</sup>BrO<sub>2</sub>.

**Methyl 3-(*tert*-butyldiphenylsilyloxy)-2-methylenebutanoate**

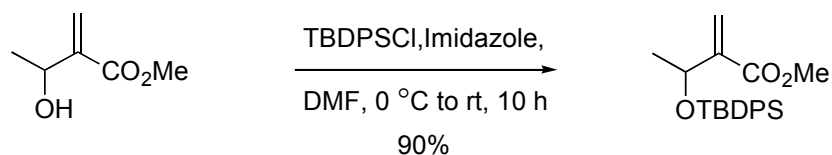

To a stirred solution of alcohol (1.07 g, 8.25 mmol) in anhydrous DMF (20 mL) was added in imidazole (0.9 g, 13 mmol) followed by *tert*-butyldiphenylsilyl chloride (2.5 mL, 9.5 mmol) at 0 °C under nitrogen. The reaction mixture was stirred for 10 h at room temperature. After completion, the reaction mixture was poured into H<sub>2</sub>O and extracted with ethyl acetate. The combined organic extracted were washed with brine, dried over anhydrous MgSO<sub>4</sub> and concentrated in *vacuo*. The residue was purified by flash chromatography on silica gel, eluting with hexane-ethyl acetate (20:1) to afford product (2.73 g, 90%) as a colorless oil.

**R<sub>f</sub>** 0.69 (hexane/ethyl acetate, 4:1);

**<sup>1</sup>H NMR (300 MHz, CDCl<sub>3</sub>):** δ 1.09 (9H, s, -C(CH<sub>3</sub>)<sub>3</sub>), 1.18 (3H, d, *J* = 6.24 Hz, -CH-CH<sub>3</sub>), 3.70 (3H, s, -CO<sub>2</sub>Me), 4.74 (1H, q, *J* = 6.24 Hz, -CH-CH<sub>3</sub>), 6.11 (1H, t, *J* = 1.38 Hz, -C=CH<sub>2</sub>), 6.24 (1H, t, *J* = 1.05 Hz, -C=CH<sub>2</sub>), 7.34-7.43 (6H, m, -Ph-H), 7.59-7.70 (4H, m, -Ph-H) ppm;

**<sup>13</sup>C NMR (75 MHz, CDCl<sub>3</sub>):** δ 19.3 (-C(CH<sub>3</sub>)<sub>3</sub>), 24.5 (-CHCH<sub>3</sub>), 27.0 (-C(CH<sub>3</sub>)<sub>3</sub>), 51.6 (-OMe), 67.8 (-CH-OTBDPS), 123.9 (-C=CH<sub>2</sub>), 127.6, (Ph-C x4), 129.7 (Ph-C x2), 134.1 (Ph-C<sub>q</sub> x2), 135.9 (Ph-C x4), 145.1 (-C=CH<sub>2</sub>), 166.5 (-CO<sub>2</sub>Me) ppm;

**IR (neat, cm<sup>-1</sup>):** 3076, 2962, 2941, 1729, 1430;

**HRMS (EI) *m/z* [(M-C<sub>4</sub>H<sub>9</sub>)<sup>+</sup>]:** obsd 311.1102, calcd 311.1103 for C<sub>18</sub>H<sub>19</sub>O<sub>3</sub>Si.

**Methyl 3-(*tert*-butyldiphenylsilyloxy)-2-methylenebutanoate**

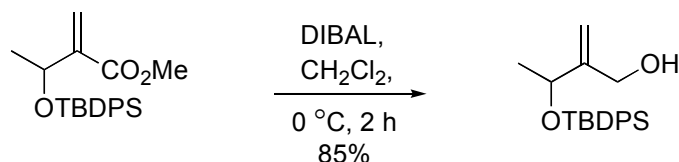

To a solution of ester (9.20 g, 25 mmol) in anhydrous CH<sub>2</sub>Cl<sub>2</sub> (150 mL) was added dropwise 1.0 M solution of DIBAL-H (50 mL, 50 mmol) at 0 °C under N<sub>2</sub>. The reaction progress was monitored by TLC. After completion, saturated Na<sub>2</sub>SO<sub>4</sub> solution was added dropwise until white precipitate was deposited and the mixture was stirred for another 10 minutes at room temperature. The resulting slurry precipitate was filtered and washed with ether. The combined organic layers was

dried over anhydrous MgSO<sub>4</sub>, filtered and concentrated in *vacuo*. The residue was purified by flash chromatography on silica gel, eluting with hexane-ethyl acetate (10:1) to afford product (7.21 g, 85%) as a colorless oil.

**R<sub>f</sub>** 0.56 (hexane/ethyl acetate, 4:1)

**<sup>1</sup>H NMR (300 MHz, CDCl<sub>3</sub>):** δ 1.07 (9H, s, -C(CH<sub>3</sub>)<sub>3</sub>), 1.19 (3H, d, *J* = 6.6 Hz, -CH-CH<sub>3</sub>), 4.11 (1H, dd, *J* = 13.41, 6.96 Hz, -CH<sub>2</sub>-OH), 4.29 (1H, dd, *J* = 13.41, 4.53 Hz, -CH<sub>2</sub>-OH), 4.43 (1H, q, *J* = 6.6 Hz, -CH-CH<sub>3</sub>), 4.99 (2H, dd, *J* = 1.38, 1.05 Hz, -C=CH<sub>2</sub>), 7.34-7.44 (6H, m, -Ph-H), 7.64-7.71 (4H, m, -Ph-H) ppm;

**<sup>13</sup>C NMR (75 MHz, CDCl<sub>3</sub>):** δ 19.2 (-C(CH<sub>3</sub>)<sub>3</sub>), 23.6 (-CHCH<sub>3</sub>), 27.0 (-C(CH<sub>3</sub>)<sub>3</sub>), 63.3 (-CH<sub>2</sub>OH), 72.2 (-CH-OTBDPS), 110.5 (-C=CH<sub>2</sub>), 127.6 (Ph-C x4), 129.7 (Ph-C x2), 133.5(Ph-C<sub>q</sub>), 134.0 (Ph-C<sub>q</sub>), 135.9 (Ph-C x4), 151.3 (-C=CH<sub>2</sub>) ppm;

**IR (neat, cm<sup>-1</sup>):** 3386, 3073, 3052, 2961, 2932, 1473, 1428;

**HRMS (EI) m/z [(M-C<sub>4</sub>H<sub>9</sub>)<sup>+</sup>]:** obsd 283.1154, calcd 283.1154 for C<sub>17</sub>H<sub>19</sub>O<sub>2</sub>Si.

### (3-(bromomethyl)but-3-en-2-yloxy)(*tert*-butyl)diphenylsilane

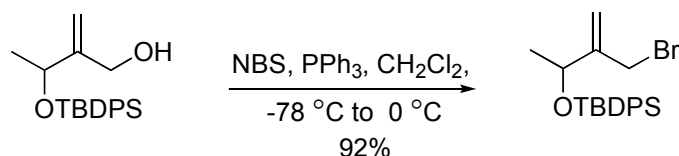

To a solution of alcohol (6.8 g, 20 mmol) in anhydrous CH<sub>2</sub>Cl<sub>2</sub> (100 mL) at 0 °C was added PPh<sub>3</sub> (6.4 g, 24 mmol) in one portion. The reaction mixture was stirred at 0 °C for 10 minutes. After all of the PPh<sub>3</sub> has dissolved, NBS (4 g, 22 mmol) was added in one portion at -78 °C. The resulting solution was stirred at -78 °C for 30 minutes then transfer to an ice bath at 0 °C. The reaction progress was monitored by TLC. After completion, ether and H<sub>2</sub>O were added subsequently. The mixture was partitioned, and the organic layer was washed with brine, dried over MgSO<sub>4</sub>, filtered and concentrated in *vacuo*. The residue was purified by flash chromatography on silica gel, eluting with hexane-ethyl acetate (40:1) to afford bromide (7.4 g, 92%) as a colorless oil.

**R<sub>f</sub>** 0.90 (hexane/ethyl acetate, 4:1);

**<sup>1</sup>H NMR (300 MHz, CDCl<sub>3</sub>):** δ 1.08 (9H, s, -C(CH<sub>3</sub>)<sub>3</sub>), 1.21 (3H, d, *J* = 6.42 Hz, -CH-CH<sub>3</sub>), 3.98 (2H, s, -CH<sub>2</sub>-Br), 4.51 (1H, q, *J* = 6.42 Hz, -CH-CH<sub>3</sub>), 5.24 (1H, s, -C=CH<sub>2</sub>), 5.32 (1H, s, -C=CH<sub>2</sub>), 7.34-7.44 (6H, m, -Ph-H), 7.64-7.71 (4H, m, -Ph-H) ppm;



# Supplementary Material (ESI) for Chemical Communications  
# This journal is (c) The Royal Society of Chemistry 2006

$^{13}\text{C}$  NMR (75 MHz,  $\text{CDCl}_3$ ):  $\delta$  19.3 (-C(CH<sub>3</sub>)<sub>3</sub>), 23.6 (-CHCH<sub>3</sub>), 27.0 (-C(CH<sub>3</sub>)<sub>3</sub>), 32.2 (-CH<sub>2</sub>Br), 70.4 (-CH-OTBDPS), 115.2 (-C=CH<sub>2</sub>), 127.6 (Ph-C x4), 129.7 (Ph-C x2), 133.6 (Ph-C<sub>q</sub>), 134.3 (Ph-C<sub>q</sub>), 135.9 (Ph-C x4), 148.9 (-C=CH<sub>2</sub>) ppm;

IR (neat,  $\text{cm}^{-1}$ ): 3075, 3052, 2965, 2932, 2859, 1473, 1428;

HRMS (EI)  $m/z$  [(M-C<sub>4</sub>H<sub>9</sub>)<sup>+</sup>]: obsd 345.0308, calcd 345.0310 for C<sub>17</sub>H<sub>18</sub>BrOSi.

#### 4-(*tert*-butyldiphenylsilyloxy)-3-methylenepentan-1-ol

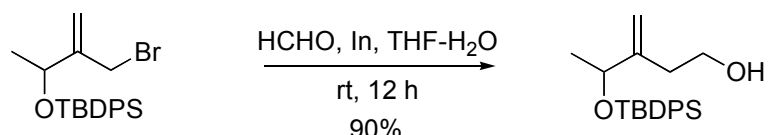

To a mixture of bromide (6.0 g, 14.8 mmol) and formaldehyde solution (35%-40% in water) (40 mL) in THF (40 mL) were added indium (3.41 g, 29.6 mmol). The mixture was stirred vigorously at room temperature for 12h, after which the reaction mixture was extracted with ethyl acetate. The organic extracts were washed with H<sub>2</sub>O, brine, dried over anhydrous Na<sub>2</sub>SO<sub>4</sub> and concentrated in *vacuo*. The crude product was purified by flash chromatography on silica gel, eluting with hexane-ethyl acetate (10:1) to afford product (4.74 g, 90%) as colorless oil.

$R_f$  0.39 (hexane/ethyl acetate, 4:1);

$^1\text{H}$  NMR (300 MHz,  $\text{CDCl}_3$ ):  $\delta$  1.07 (9H, s, -C(CH<sub>3</sub>)<sub>3</sub>), 1.15 (3H, d,  $J$  = 6.44 Hz, -CH-CH<sub>3</sub>), 2.24 (1H, dt,  $J$  = 14.81, 5.55 Hz, -CH<sub>2</sub>CH<sub>2</sub>OH), 2.39 (1H, dt,  $J$  = 14.81, 6.63 Hz, -CH<sub>2</sub>CH<sub>2</sub>OH), 3.58-3.74 (2H, m, -CH<sub>2</sub>-OH), 4.27 (1H, q,  $J$  = 6.44 Hz, -CH-CH<sub>3</sub>), 4.81 (1H, s, C=CH<sub>2</sub>), 5.03 (1H, s, -C=CH<sub>2</sub>), 7.34-7.45 (6H, m, -Ph-H), 7.64-7.70 (4H, m, -Ph-H) ppm;

$^{13}\text{C}$  NMR (75 MHz,  $\text{CDCl}_3$ ):  $\delta$  19.2 (-C(CH<sub>3</sub>)<sub>3</sub>), 23.2 (-CHCH<sub>3</sub>), 27.0 (-C(CH<sub>3</sub>)<sub>3</sub>), 34.8 (-CH<sub>2</sub>CH<sub>2</sub>OH), 61.5 (-CH<sub>2</sub>OH), 73.0 (-CH-OTBDPS), 111.9 (-C=CH<sub>2</sub>), 127.6 (Ph-C x4), 129.7 (Ph-C x2), 133.7 (Ph-C<sub>q</sub>), 134.1 (Ph-C<sub>q</sub>), 135.9 (Ph-C x4), 149.3 (-C=CH<sub>2</sub>) ppm;

IR (neat,  $\text{cm}^{-1}$ ): 3441, 3369, 3075, 3052, 2965, 2931, 2858, 1473, 1428;

HRMS (EI)  $m/z$  [(M-C<sub>4</sub>H<sub>9</sub>)<sup>+</sup>]: obsd 297.1316, calcd 297.1311 for C<sub>18</sub>H<sub>21</sub>O<sub>2</sub>Si.

#### 3-methylenepentane-1,4-diol

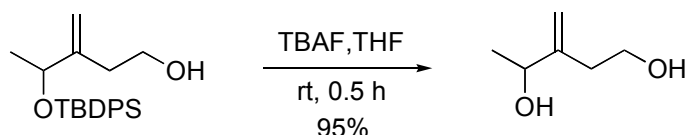

To a solution of alcohol (1.0 g, 2.8 mmol) in THF (6 mL) was treated with TBAF (4.2 mL, 1.0 M in THF solution, 4.2 mmol) at room temperature. The mixture was stirred for 30 minutes. After the reaction was completed (monitor by TLC), THF was removed in *vacuo*. The residue was purified by flash chromatography on silica gel, eluting with hexane-ethyl acetate (2:1 to 1:1). The diol was obtained as a colorless oil, (0.30 g, 95%).

$R_f$  0.12 (hexane/ethyl acetate, 1:1);

$^1\text{H NMR}$  (300 MHz,  $\text{CDCl}_3$ ):  $\delta$  1.30 (3H, d,  $J = 6.27$  Hz,  $-\text{CH}-\text{CH}_3$ ), 2.29 (1H, dt,  $J = 14.21, 5.22$  Hz,  $-\text{CH}_2\text{CH}_2\text{OH}$ ), 2.42 (1H, dt,  $J = 14.21, 6.09$  Hz,  $-\text{CH}_2\text{CH}_2\text{OH}$ ), 3.66-3.82 (2H, m,  $-\text{CH}_2-\text{OH}$ ), 4.30 (1H, q,  $J = 6.27$  Hz,  $-\text{CH}-\text{CH}_3$ ), 4.90 (1H, s,  $-\text{C}=\text{CH}_2$ ), 5.10 (1H, s,  $-\text{C}=\text{CH}_2$ ) ppm;

$^{13}\text{C NMR}$  (75 MHz,  $\text{CDCl}_3$ ):  $\delta$  22.0 ( $-\text{CH}-\text{CH}_3$ ), 35.0 ( $-\text{CH}_2\text{CH}_2\text{OH}$ ), 62.3 ( $-\text{CH}_2\text{OH}$ ), 70.9 ( $-\text{CH}-\text{OH}$ ), 112.2 ( $-\text{C}=\text{CH}_2$ ), 150.1 ( $-\text{C}=\text{CH}_2$ ) ppm;

IR (neat,  $\text{cm}^{-1}$ ): 3386, 2976, 2936, 2887;

HRMS (EI)  $m/z$  [ $(\text{M}-\text{H}_2\text{O})^+$ ]: obsd 98.0733, calcd 98.0732 for  $\text{C}_6\text{H}_{10}\text{O}$ .

#### 5-(*tert*-butyldiphenylsilyloxy)-3-methylenepentan-2-ol

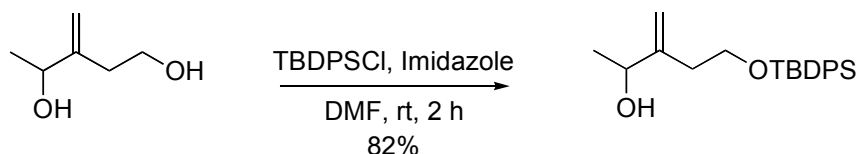

To a solution of diol (0.60 g, 5 mmol) in anhydrous DMF (30 mL) at 0 °C was added imidazole (0.70 g, 10 mmol) in one portion. After the imidazole has dissolved, *tert*-butyldiphenylsilyl chloride (1.5 mL, 5.75 mmol) was added in. After the reaction was completed (monitor by TLC), the reaction mixture was poured into ice water and extracted with ethyl acetate. The combined organic extract was washed with brine, dried over anhydrous  $\text{MgSO}_4$  and concentrated in *vacuo*. The residue was purified by flash chromatography on silica gel to afford the product (1.45 g, 82%) as a colorless oil.

$R_f$  0.66 (hexane/ethyl acetate, 4:1);

$^1\text{H NMR}$  (300 MHz,  $\text{CDCl}_3$ ):  $\delta$  1.05 (9H, s,  $-\text{C}(\text{CH}_3)_3$ ), 1.27 (3H, d,  $J = 6.45$  Hz,  $-\text{CH}-\text{CH}_3$ ), 2.27 (1H, dt,  $J = 14.26, 5.58$  Hz,  $-\text{CH}_2\text{CH}_2\text{OTBDPS}$ ), 2.45 (1H, dt,  $J = 14.26, 6.63$  Hz,  $-\text{CH}_2\text{CH}_2\text{OTBDPS}$ ), 3.73-3.83 (2H, m,  $-\text{CH}_2\text{OTBDPS}$ ), 4.27 (1H, q,

# Supplementary Material (ESI) for Chemical Communications  
# This journal is (c) The Royal Society of Chemistry 2006

$J = 6.45$  Hz, -CH-OH), 4.83 (1H, s, -C=CH<sub>2</sub>), 5.07 (1H, s, -C=CH<sub>2</sub>), 7.36-7.46 (6H, m, -Ph-H), 7.66-7.71 (4H, m, -Ph-H) ppm;

<sup>13</sup>C NMR (75 MHz, CDCl<sub>3</sub>):  $\delta$  19.1 (-C(CH<sub>3</sub>)<sub>3</sub>), 22.3 (-CHCH<sub>3</sub>), 26.8 (-C(CH<sub>3</sub>)<sub>3</sub>), 34.7 (-CH<sub>2</sub>CH<sub>2</sub>OTBDPS), 63.1 (-CH<sub>2</sub>OTBDPS), 70.8 (-CHOH), 111.2 (-C=CH<sub>2</sub>), 127.7 (Ph-C x4), 129.8 (Ph-C x2), 133.4 (Ph-C<sub>q</sub>), 134.8 (Ph-C<sub>q</sub>), 135.6 (Ph-C x4), 150.6 (-C=CH<sub>2</sub>) ppm;

IR (neat, cm<sup>-1</sup>): 3398, 3072, 3053, 2960, 2931, 2858, 1472, 1458;

HRMS (EI)  $m/z$  [(M-C<sub>4</sub>H<sub>9</sub>)<sup>+</sup>]: obsd 297.1324, calcd 297.1311 for C<sub>18</sub>H<sub>21</sub>O<sub>2</sub>Si.

#### (4-bromo-3-methylenepentyloxy)(*tert*-butyl)diphenylsilane (**6**)

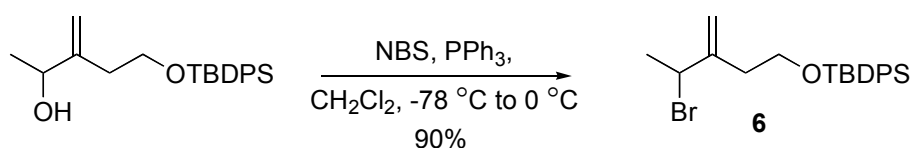

To a solution of alcohol (1.05 g, 3 mmol) in anhydrous CH<sub>2</sub>Cl<sub>2</sub> (9 mL) at 0 °C was added PPh<sub>3</sub> (0.96 g, 3.6 mmol) in one portion. The reaction mixture was stirred at 0 °C for 10 minutes. After all PPh<sub>3</sub> has dissolved, NBS (0.6 g, 3.3 mmol) was added in one portion at -78 °C. The resulting solution was stirred at -78 °C for 30 minutes then transferred to ice bath at 0 °C. After completion (monitored by TLC), ether and H<sub>2</sub>O were added subsequently. The mixture was partitioned, and the organic layer was washed with brine, dried over MgSO<sub>4</sub>, filtered and concentrated in *vacuo*. The residue was purified by flash chromatography on silica gel, eluting with hexane-ethyl acetate (40:1) to afford **6** (1.12 g, 90%) as a colorless oil.

$R_f$  0.85 (hexane/ethyl acetate, 4:1);

<sup>1</sup>H NMR (300 MHz, CDCl<sub>3</sub>):  $\delta$  1.07 (9H, s, -C(CH<sub>3</sub>)<sub>3</sub>), 1.77 (3H, d,  $J = 6.9$  Hz, -CH-CH<sub>3</sub>), 2.40-2.60 (2H, m, -CH<sub>2</sub>-C=), 3.84 (2H, t,  $J = 6.6$  Hz, -CH<sub>2</sub>-O-), 4.69 (1H, q,  $J = 6.9$  Hz, -CH-CH<sub>3</sub>), 4.95 (1H, s, C=CH<sub>2</sub>), 5.21 (1H, s, -C=CH<sub>2</sub>), 7.37-7.46 (6H, m, -Ph-H), 7.67-7.70 (4H, m, -Ph-H) ppm;

<sup>13</sup>C NMR (75 MHz, CDCl<sub>3</sub>):  $\delta$  19.2 (-C(CH<sub>3</sub>)<sub>3</sub>), 24.2 (-CHCH<sub>3</sub>), 26.9 (-C(CH<sub>3</sub>)<sub>3</sub>), 35.7 (-CH<sub>2</sub>CH<sub>2</sub>OTBDPS), 52.5 (-CHBr), 63.1 (-CH<sub>2</sub>OTBDPS), 113.3 (-C=CH<sub>2</sub>), 127.7 (Ph-C x4), 129.7 (Ph-C x2), 133.7 (Ph-C<sub>q</sub>), 133.8 (Ph-C<sub>q</sub>), 135.6 (Ph-C x4), 147.5 (-C=CH<sub>2</sub>) ppm;

IR (neat, cm<sup>-1</sup>): 3072, 2958, 2931, 2858, 1590, 1428;

HRMS (EI)  $m/z$  [(M-C<sub>4</sub>H<sub>9</sub>)<sup>+</sup>]: obsd 359.0469, calcd 359.0467 for C<sub>18</sub>H<sub>20</sub>SiBrO.

**Syn-(5E,7E)-methyl 4-hydroxy-3,5,7,9,9-pentamethyl-2-methylenedeca-5,7-dienoate (12)**

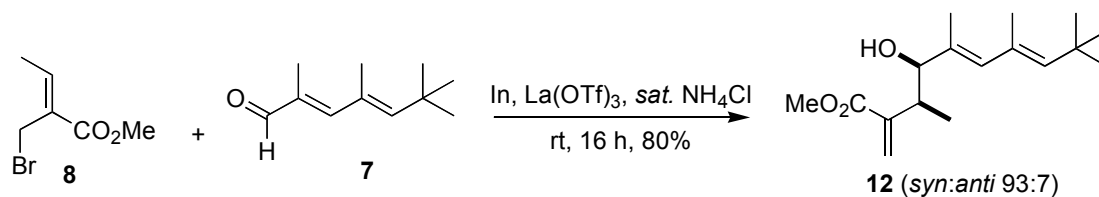

To a stirred solution of **8** (3.65 mL, 28 mmol) in *sat.* NH<sub>4</sub>Cl solution (50 mL) were added indium (2.18 g, 18.9 mmol). After vigorous stirred for 30 minutes at room temperature, La(OTf)<sub>3</sub> (5.5 g, 9 mmol) and **7** (1.57 g, 9.46 mmol) were subsequently added. The mixture was stirred vigorously at room temperature for 16 h. After the reaction was completed (monitored by TLC), the reaction mixture was extracted with ethyl acetate. The organic extracts were combined and washed with *sat.* NaHCO<sub>3</sub> solution, brine, dried over anhydrous Na<sub>2</sub>SO<sub>4</sub>, and concentrated in *vacuo*. The crude product was purified by flash chromatography on silica gel, eluting with 5% ethyl acetate in hexane gave **12** (2.12 g, 80%) as a colorless oil. The *syn/anti* isomer were obtain in the ratio of 93:7.

**R<sub>f</sub>** 0.47 (hexane/ethyl acetate, 4:1);

**Syn isomer:**

**<sup>1</sup>H NMR (500 MHz, CDCl<sub>3</sub>):** δ 1.11 (3H, d, *J* = 6.95 Hz, -CH-CH<sub>3</sub>), 1.13 (9H, s, -C(CH<sub>3</sub>)<sub>3</sub>), 1.72 (3H, d, *J* = 1.4 Hz, -C-CH<sub>3</sub>), 1.78 (3H, d, *J* = 0.9 Hz, -C-CH<sub>3</sub>), 2.99 (1H, ddd, *J* = 6.95, 4.15, 0.95 Hz -CH-CH<sub>3</sub>), 3.75 (3H, s, -COOCH<sub>3</sub>), 4.08 (1H, d, *J* = 4.15 Hz, -CH-OH), 5.24 (1H, d, *J* = 1.30 Hz, -C=CH<sub>2</sub>), 5.64 (1H, d, *J* = 0.95 Hz, -C=CH-), 5.82 (1H, d, *J* = 1.30 Hz, -C=CH<sub>2</sub>), 6.24 (1H, d, *J* = 0.95 Hz, -C=CH-) ppm;  
**<sup>13</sup>C NMR (125 MHz, CDCl<sub>3</sub>):** δ 13.8 (-CH<sub>3</sub>), 13.8 (-CH<sub>3</sub>), 17.8 (-CH<sub>3</sub>), 30.9 (-C(CH<sub>3</sub>)<sub>3</sub>), 32.5 (-C(CH<sub>3</sub>)<sub>3</sub>), 38.9 (-CH-CH<sub>3</sub>), 51.7 (-OMe), 78.9 (-CHOH), 125.4 (-C=CH<sub>2</sub>), 130.8 (-C=CH-), 131.8 (-C=CH-), 134.5 (-C=CH-), 139.8 (-C=CH-), 143.2 (-C=CH<sub>2</sub>), 167.6 (C=O) ppm;

**IR (neat, cm<sup>-1</sup>):** 3440, 2954, 1717, 1625, 1437;

**HRMS (EI) m/z (M<sup>+</sup>):** obsd 280.2032, calcd 280.2039 for C<sub>17</sub>H<sub>28</sub>O<sub>3</sub>.

**Syn-(5E,7E)-3,5,7,9,9-pentamethyl-2-methylenedeca-5,7-diene-1,4-diol (13)**

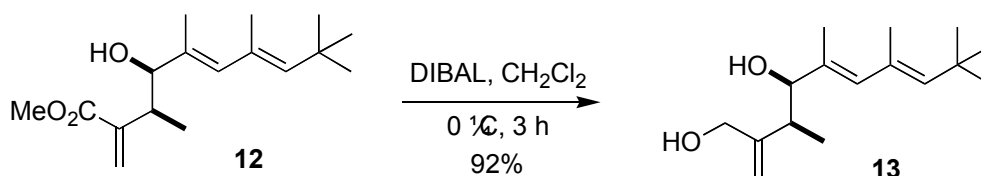

To a mixture of *syn* **12** (0.7 g, 2.5 mmol) in anhydrous  $\text{CH}_2\text{Cl}_2$  (5 mL), was added DIBAL-H (5 mL, 5 mmol) at 0 °C and stirred for 3h. After reduction was completed (monitored by TLC), *sat.*  $\text{Na}_2\text{SO}_4$  solution was added until white precipitate was deposited. The mixture was filtered, dried over anhydrous  $\text{MgSO}_4$  and concentrated in *vacuo*. The residue was purified by flash chromatography on silica gel (hexane ethyl / acetate, 4:1) to afford the pure *syn* **13** (0.58 g, 92%) as a colorless oil.

$R_f$  0.40 (hexane/ethyl acetate, 2:1);

$^1\text{H NMR}$  (500 MHz,  $\text{CDCl}_3$ ):  $\delta$  1.02 (3H, d,  $J = 6.96$  Hz,  $-\text{CH}-\text{CH}_3$ ), 1.27 (9H, s,  $-\text{C}(\text{CH}_3)_3$ ), 1.70 (3H, d,  $J = 1.05$  Hz,  $-\text{C}-\text{CH}_3$ ), 1.79 (3H, d,  $J = 1.05$  Hz,  $-\text{C}-\text{CH}_3$ ), 2.54 (1H, dq,  $J = 6.96, 3.84$  Hz,  $-\text{CH}-\text{CH}_3$ ), 2.63 (2H, brs,  $-\text{CH}_2\text{OH}$ ,  $-\text{CHOH}$ ), 4.04 (1H, d,  $J = 3.84$  Hz,  $-\text{CH}-\text{OH}$ ), 4.06 (1H, d,  $J = 13.23$  Hz,  $-\text{CH}_2-\text{OH}$ ), 4.14 (1H, d,  $J = 13.23$  Hz,  $-\text{CH}_2-\text{OH}$ ), 4.99 (1H, brs,  $-\text{C}=\text{CH}-$ ), 5.13 (brs, 1H,  $-\text{C}=\text{CH}_2$ ), 5.25 (1H, d,  $J = 1.38$  Hz,  $-\text{C}=\text{CH}_2$ ), 5.87 (1H, brs,  $-\text{C}=\text{CH}-$ ) ppm;

$^{13}\text{C NMR}$  (125 MHz,  $\text{CDCl}_3$ ):  $\delta$  12.7 ( $-\text{CH}-\text{CH}_3$ ), 14.8 ( $-\text{C}-\text{CH}_3$ ), 18.0 ( $-\text{C}-\text{CH}_3$ ), 30.9 ( $-\text{C}(\text{CH}_3)_3$ ), 32.5 ( $-\text{C}(\text{CH}_3)_3$ ), 41.2 ( $-\text{CH}-\text{CH}_3$ ), 64.7 ( $-\text{CH}_2\text{OH}$ ), 78.8 ( $-\text{CHOH}$ ), 112.7 ( $-\text{C}=\text{CH}_2$ ), 130.9 ( $-\text{C}=\text{CH}-$ ), 131.3 ( $-\text{C}=\text{CH}-$ ), 134.3 ( $-\text{C}=\text{CH}-$ ), 140.0 ( $-\text{C}=\text{CH}-$ ), 151.4 ( $-\text{C}=\text{CH}_2$ ) ppm;

IR (neat,  $\text{cm}^{-1}$ ): 3354, 2958, 1713, 1651, 1644;

HRMS (EI)  $m/z$  ( $\text{M}^+$ ): obsd 252.2103, calcd 252.2089 for  $\text{C}_{16}\text{H}_{28}\text{O}_2$ .

***Syn*-(5*E*,7*E*)-2-((*tert*-butyldiphenylsilyloxy)methyl)-3,5,7,9,9-pentamethyldeca-1,5,7-trien-4-ol (**14**)**

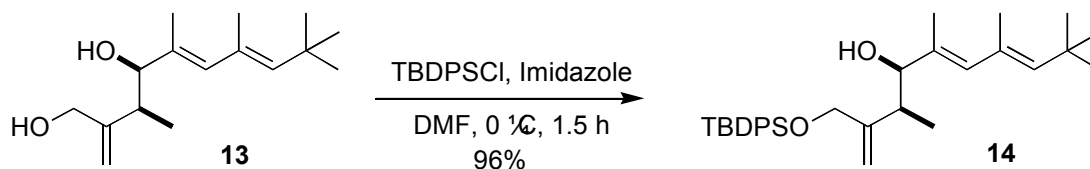

To a solution of *syn* **13** (0.73 g, 2.89 mmol) in anhydrous DMF (9 mL) was added imidazole (0.40 g, 5.78 mmol) and *tert*-butyldiphenylsilyl chloride (0.85 mL, 3.18 mmol) at 0 °C under  $\text{N}_2$ . The mixture was stirred at 0 °C to room temperature for 1.5h. After completion, the mixture was poured into water and extracted with ethyl

acetate (x3). The combined organic extract was washed with brine, dried (MgSO<sub>4</sub>), concentrated and purified by flash chromatography on silica gel to afford **14** (1.36 g, 96%) as a colorless oil.

*R<sub>f</sub>* 0.46 (hexane/ethyl acetate, 4:1);

<sup>1</sup>H NMR (300 MHz, CDCl<sub>3</sub>): δ 1.01 (3H, d, *J* = 6.96 Hz, -CH-CH<sub>3</sub>), 1.06 (9H, s, -C(CH<sub>3</sub>)<sub>3</sub>), 1.14 (9H, s, -C(CH<sub>3</sub>)<sub>3</sub>), 1.67 (3H, d, *J* = 1.05 Hz, -C-CH<sub>3</sub>), 1.79 (3H, d, *J* = 1.38 Hz, -C-CH<sub>3</sub>), 2.50 (1H, dq, *J* = 6.96, 4.5 Hz, -CH-CH<sub>3</sub>), 3.97 (1H, d, *J* = 4.5 Hz, -CH-OH), 4.12 (1H, d, *J* = 13.6 Hz, -CH<sub>2</sub>-O-), 4.19 (1H, d, *J* = 13.6 Hz, -CH<sub>2</sub>-O-), 5.00 (1H, s, -C=CH<sub>2</sub>), 5.26 (2H, d, *J* = 1.41 Hz, -C=CH-, -C=CH<sub>2</sub>), 5.88 (1H, s, -C=CH-), 7.38-7.44 (6H, m, -Ph-H), 7.66-7.70 (4H, m, -Ph-H) ppm;

<sup>13</sup>C NMR (75 MHz, CDCl<sub>3</sub>): δ 13.0 (-CH<sub>3</sub>), 14.6 (-CH<sub>3</sub>), 18.0 (-CH<sub>3</sub>), 19.2 (-C(CH<sub>3</sub>)<sub>3</sub>), 26.8 (-C(CH<sub>3</sub>)<sub>3</sub>), 29.6 (-C(CH<sub>3</sub>)<sub>3</sub>), 30.9 (-C(CH<sub>3</sub>)<sub>3</sub>), 40.1 (-CHCH<sub>3</sub>), 65.9 (-CH<sub>2</sub>OTBDPS), 77.8 (-CHOH), 111.2 (-C=CH<sub>2</sub>), 127.7 (-Ph-C), 129.7 (-Ph-C), 131.0 (-C=CH-), 131.3 (-C=CH-), 133.4 (-Ph-C), 134.1 (-C=CH-), 135.5 (-Ph-C), 139.8 (-C=CH-), 150.5 (-C=CH<sub>2</sub>) ppm;

IR (neat, cm<sup>-1</sup>): 3434, 2929, 1646;

HRMS (EI) *m/z* [(M-C<sub>4</sub>H<sub>9</sub>)<sup>+</sup>]: obsd 433.2535, calcd 433.2563 for C<sub>28</sub>H<sub>37</sub>O<sub>2</sub>Si.

**(5*E*,7*E*)-2-((*tert*-butyldiphenylsilyloxy)methyl)-3,5,7,9,9-pentamethyldeca-1,5,7-trien-4-one (15)**

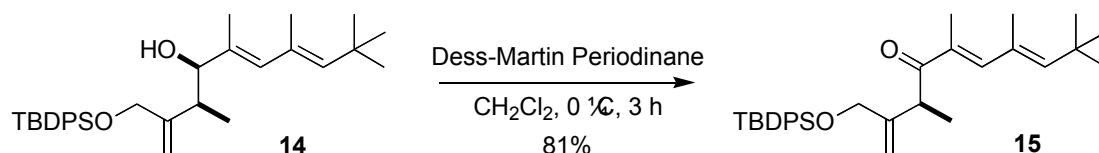

To a solution of Dess-Martin reagent (1.75 g, 4.12 mmol) in anhydrous CH<sub>2</sub>Cl<sub>2</sub> (15 mL) was added dropwise of **14** (1.35 g, 2.75 mmol) prediluted in CH<sub>2</sub>Cl<sub>2</sub> (5 mL) at 0 °C. The reaction mixture was stirred under nitrogen at 0 °C for 3h. After completion, the reaction mixture was diluted with ether and poured slowly into a Na<sub>2</sub>S<sub>2</sub>O<sub>3</sub> : NaHCO<sub>3</sub> (1:1) solution and stirred for 10 minutes and extract with ether. The combine etherate layer was washed with NaHCO<sub>3</sub>, brine and dried over anhydrous MgSO<sub>4</sub>. Solvent was removed in *vacuo*. The residue was purified by flash chromatography on silica gel to provide **15** (1.09 g, 81%) as a colorless oil.

*R<sub>f</sub>* 0.66 (hexane/ethyl acetate, 4:1);

**<sup>1</sup>H NMR (300 MHz, CDCl<sub>3</sub>):** δ 1.09 (9H, s, -C(CH<sub>3</sub>)<sub>3</sub>), 1.17 (9H, s, -C(CH<sub>3</sub>)<sub>3</sub>), 1.22 (3H, d, *J* = 6.96 Hz, -CH-CH<sub>3</sub>), 1.88 (3H, d, *J* = 1.05 Hz, -C-CH<sub>3</sub>), 1.91 (3H, d, *J* = 1.05 Hz, -C-CH<sub>3</sub>), 4.03 (1H, q, *J* = 6.96 Hz, -CH-CH<sub>3</sub>), 4.16 (1H, d, *J* = 13.5 Hz, -CH<sub>2</sub>-O-), 4.22 (1H, d, *J* = 13.5 Hz, -CH<sub>2</sub>-O-), 4.93 (1H, brs, -C=CH<sub>2</sub>), 5.23 (1H, d, *J* = 1.05 Hz, -C=CH<sub>2</sub>-), 5.54 (1H, brs, -C=CH-), 6.99 (1H, brs, -C=CH-), 7.36-7.44 (6H, m, -Ph-H), 7.68-7.70 (4H, m, -Ph-H) ppm;

**<sup>13</sup>C NMR (75 MHz, CDCl<sub>3</sub>):** δ 13.4 (-CH<sub>3</sub>), 16.9 (-CH<sub>3</sub>), 17.4 (-CH<sub>3</sub>), 19.2 (-C(CH<sub>3</sub>)<sub>3</sub>), 26.8 (-C(CH<sub>3</sub>)<sub>3</sub>), 30.6 (-C(CH<sub>3</sub>)<sub>3</sub>), 32.9 (-C(CH<sub>3</sub>)<sub>3</sub>), 42.4 (-CHCH<sub>3</sub>), 65.8 (-CH<sub>2</sub>OTBDPS), 111.1 (-C=CH<sub>2</sub>), 127.7 (-Ph-C x4), 129.7 (-Ph-C x2), 130.9 (Ph-Cq x2), 133.3 (-C=CH), 133.7 (-C=CH), 135.4 (-Ph-C x4), 144.9 (-C=CH-), 145.3 (-C=CH-), 148.4 (-C=CH<sub>2</sub>), 203.1 (-C=O) ppm;

**IR (neat, cm<sup>-1</sup>):** 2960, 1663, 1648, 1634;

**HRMS (EI) m/z (M<sup>+</sup>):** obsd 488.3092, calcd 488.3111 for C<sub>32</sub>H<sub>44</sub>O<sub>2</sub>Si.

***Anti*-(5*E*,7*E*)-2-((*tert*-butyldiphenylsilyloxy)methyl)-3,5,7,9,9-pentamethyldeca-1,5,7-trien-4-ol (**16**)**

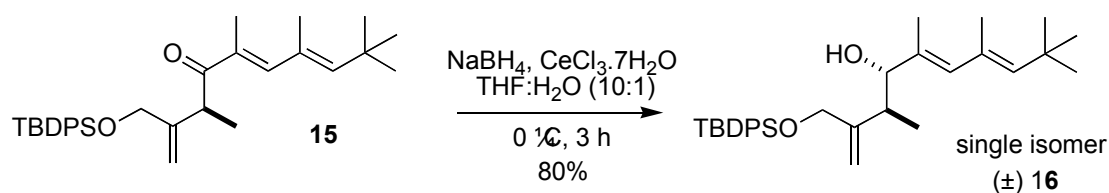

To a solution of **15** (490 mg, 1 mmol) in THF:H<sub>2</sub>O (10:1) (5 mL) was added CeCl<sub>3</sub>·7H<sub>2</sub>O (130 mg, 1.5 mmol) at 0 °C. After the mixture was stirred at 0 °C for 15 minutes, NaBH<sub>4</sub> (60 mg, 1.5 mmol) was added and the reaction was stirred for 3h. After the reaction was completed (monitored by TLC), THF was removed under *vacuo*. H<sub>2</sub>O was added and the mixture was extracted with ether. The combined etherate layer was washed with brine, dried over MgSO<sub>4</sub>, concentrated and purified through flash chromatography on silica gel to afford **16** (396 mg, 80%) as a colorless oil. (*anti:syn* > 99:1)

**R<sub>f</sub>** 0.46 (hexane/ethyl acetate, 4:1);

**<sup>1</sup>H NMR (300 MHz, CDCl<sub>3</sub>):** δ 0.87 (3H, d, *J* = 6.96 Hz, -CH-CH<sub>3</sub>), 1.07 (9H, s, -C(CH<sub>3</sub>)<sub>3</sub>), 1.13 (9H, s, -C(CH<sub>3</sub>)<sub>3</sub>), 1.71 (3H, d, *J* = 1.40 Hz, -C-CH<sub>3</sub>), 1.79 (3H, d, *J* = 1.05 Hz, -C-CH<sub>3</sub>), 2.39 (1H, dq, *J* = 9.40, 6.96 Hz, -CH-CH<sub>3</sub>), 3.80 (1H, dd, *J* = 9.40, 2.45 Hz, -CH-OH), 4.14 (2H, s, -CH<sub>2</sub>-O-), 5.09 (1H, s, -C=CH<sub>2</sub>), 5.30 (1H, d, *J*

# Supplementary Material (ESI) for Chemical Communications

# This journal is (c) The Royal Society of Chemistry 2006

= 1.40 Hz, -C=CH<sub>2</sub>-), 5.32 (1H, d, *J* = 1.40 Hz, -C=CH-), 5.80 (1H, s, -C=CH-), 7.36-7.44 (6H, m, -Ph-H), 7.69-7.72 (4H, m, -Ph-H) ppm;

<sup>13</sup>C NMR (75 MHz, CDCl<sub>3</sub>): δ 11.9 (-CH<sub>3</sub>), 17.5 (-CH<sub>3</sub>), 17.9 (-CH<sub>3</sub>), 19.1 (-C(CH<sub>3</sub>)<sub>3</sub>), 26.8 (-C(CH<sub>3</sub>)<sub>3</sub>), 29.6 (-C(CH<sub>3</sub>)<sub>3</sub>), 30.9 (-C(CH<sub>3</sub>)<sub>3</sub>), 41.8 (-CHCH<sub>3</sub>), 66.0 (-CH<sub>2</sub>OTBDPS), 82.0 (-CHOH), 111.2 (-C=CH<sub>2</sub>), 127.7 (-Ph-C x4), 129.8 (-Ph-C x2), 130.6 (-C=CH-), 133.1 (Ph-C<sub>q</sub> x2), 134.1 (-C=CH), 134.3 (-C=CH-), 135.6 (-Ph-C x4), 140.2 (-C=CH), 150.3 (-C=CH<sub>2</sub>) ppm;

IR (neat, cm<sup>-1</sup>): 3428, 2957, 2930, 1649, 1558;

HRMS (EI) m/z [(M-C<sub>4</sub>H<sub>9</sub>)<sup>+</sup>]: obsd 433.2535, calcd 433.2563 for C<sub>28</sub>H<sub>37</sub>O<sub>2</sub>Si.

***Anti*-(5*E*,7*E*)-3,5,7,9,9-pentamethyl-2-methylenedeca-5,7-diene-1,4-diol (**17**)**

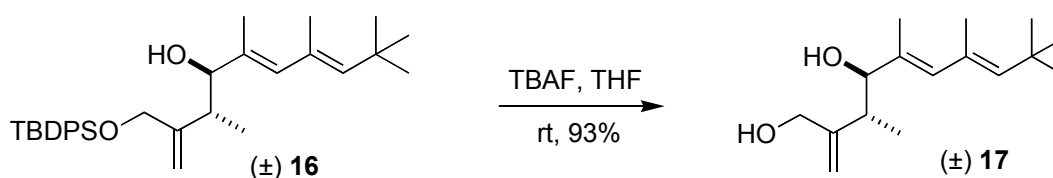

To a solution of **16** (0.5 g, 1.02 mmol) in THF (2 mL) was added TBAF (1.5 mL, 1.0 M in THF, 1.5 mmol). The mixture was stirred for 30 minutes at room temperature. After the reaction was completed (monitored by TLC), the mixture was concentrated *in vacuo* to remove the THF. The residue was purified by flash chromatography on silica gel to afford **17** (0.24 g, 93%) as a colorless oil.

R<sub>f</sub> 0.40 (hexane/ethyl acetate, 2:1);

<sup>1</sup>H NMR (500 MHz, CDCl<sub>3</sub>): δ 0.94 (3H, d, *J* = 6.95 Hz, -CH-CH<sub>3</sub>), 1.13 (9H, s, -C(CH<sub>3</sub>)<sub>3</sub>), 1.73 (3H, d, *J* = 1.4 Hz, -C-CH<sub>3</sub>), 1.81 (3H, d, *J* = 0.95 Hz, -C-CH<sub>3</sub>), 2.27 (2H, brs, -CH<sub>2</sub>OH, -CHOH), 2.48 (1H, dq, *J* = 9.25, 6.95 Hz, -CH-CH<sub>3</sub>), 3.82 (1H, d, *J* = 9.25 Hz, -CH-OH), 4.10 (1H, dd, *J* = 12.47, 0.95 Hz, -CH<sub>2</sub>-OH), 4.15 (1H, dd, *J* = 12.47, 0.95 Hz, -CH<sub>2</sub>-OH), 5.05 (1H, s, -C=CH-), 5.19 (1H, d, *J* = 0.95 Hz, -C=CH<sub>2</sub>), 5.31 (1H, d, *J* = 0.95 Hz, -C=CH<sub>2</sub>), 5.83 (1H, s, -C=CH-) ppm;

<sup>13</sup>C NMR (125 MHz, CDCl<sub>3</sub>): δ 12.1 (-CH-CH<sub>3</sub>), 17.6 (-C-CH<sub>3</sub>), 17.9 (-C-CH<sub>3</sub>), 30.9 (-C(CH<sub>3</sub>)<sub>3</sub>), 32.6 (-C(CH<sub>3</sub>)<sub>3</sub>), 41.2 (-CH-CH<sub>3</sub>), 65.6 (-CH<sub>2</sub>OH), 83.1 (-CHOH), 112.8 (-C=CH<sub>2</sub>), 130.7 (-C=CH-), 134.3 (-C=CH-), 134.5 (-C=CH-), 140.6 (-C=CH-), 151.5 (-C=CH<sub>2</sub>) ppm;

IR (neat, cm<sup>-1</sup>): 3353, 2958, 1743, 1643;

HRMS (ESI) m/z (M<sup>+</sup>-1): obsd 251.2011, calcd 252.2011 for C<sub>16</sub>H<sub>27</sub>O<sub>2</sub>.



**(1*S*,1'*S*)-2,2'-((3*R*,4*R*,5*E*,7*E*)-3,5,7,9,9-pentamethyl-2-methylenedeca-5,7-diene-1,4-diyl)bis(oxy)bis(2-oxo-1-phenylethane-2,1-diyl) diacetate (*R,R*)-B and (1*S*,1'*S*)-2,2'-((3*S*,4*S*,5*E*,7*E*)-3,5,7,9,9-pentamethyl-2-methylenedeca-5,7-diene-1,4-diyl)bis(oxy)bis(2-oxo-1-phenylethane-2,1-diyl) diacetate (*S,S*)-C**

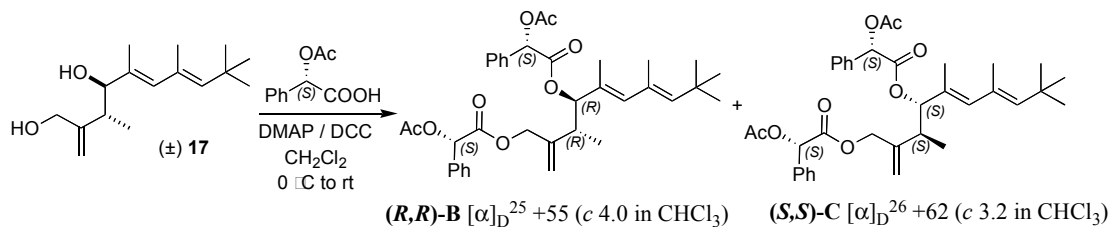

To a mixture of *anti* ( $\pm$ )-**17** (0.24 g, 0.95 mmol), *S*-(+)- $\alpha$ -acetoxyphenylacetic acid (0.56 g, 2.85 mmol) and DMAP (12 mg, 0.095 mmol) in dried CH<sub>2</sub>Cl<sub>2</sub> (4 mL) was added DCC (0.39 g, 1.9 mmol) prediluted in 1 mL CH<sub>2</sub>Cl<sub>2</sub> dropwise at 0 °C. The reaction mixture was stirred at room temperature for 12 h. After completion, CH<sub>2</sub>Cl<sub>2</sub> was removed *via* rotary evaporator and the crude product was directly subjected to column chromatography. Purification by flash chromatography on silica gel (Hex:CH<sub>2</sub>Cl<sub>2</sub>:EA (3:3:0.2)) afforded two pure enantiomers as colorless oil with 96% overall yield.

**(*R,R*)-B**

*R*<sub>f</sub> 0.36 (hexane/CH<sub>2</sub>Cl<sub>2</sub>/ethyl acetate, 3:3:0.25);

[ $\alpha$ ]<sub>D</sub><sup>25</sup> +55.4 (*c* 4.0 in CHCl<sub>3</sub>);

<sup>1</sup>H NMR (500 MHz, CDCl<sub>3</sub>):  $\delta$  0.72 (3H, d, *J* = 7.4 Hz, -CH-CH<sub>3</sub>), 1.12 (9H, s, -C(CH<sub>3</sub>)<sub>3</sub>), 1.64 (3H, d, *J* = 1.4 Hz, -C-CH<sub>3</sub>), 1.76 (3H, d, *J* = 1.35 Hz, -C-CH<sub>3</sub>), 2.14 (3H, s, -OAc), 2.19 (3H, s, -OAc), 2.33 (1H, dq, *J* = 9.7, 7.4 Hz, -CH-CH<sub>3</sub>), 4.11 (1H, d, *J* = 12.95 Hz, -CH<sub>2</sub>-O-), 4.19 (1H, d, *J* = 12.95 Hz, -CH<sub>2</sub>-O-), 4.62 (1H, s, -C=CH<sub>2</sub>-), 4.68 (1H, s, -C=CH<sub>2</sub>), 4.99 (1H, d, *J* = 9.7 Hz, -CH-O-), 5.24 (1H, t, *J* = 1.35 Hz, -C=CH-), 5.85 (1H, s, -C=CH-), 5.87 (1H, s, -CH-OAc), 5.92 (1H, s, -CH-OAc), 7.26-7.27 (3H, m, -Ph-H), 7.33-7.35 (2H, m, -Ph-H), 7.38-7.39 (3H, m, -Ph-H), 7.45-7.47 (2H, m, -Ph-H) ppm;

<sup>13</sup>C NMR (125 MHz, CDCl<sub>3</sub>):  $\delta$  12.7 (-C-CH<sub>3</sub>), 16.9 (OAc), 17.7 (OAc), 20.6 (-C-CH<sub>3</sub>), 30.8 (-C(CH<sub>3</sub>)<sub>3</sub>), 32.5 (-C(CH<sub>3</sub>)<sub>3</sub>), 38.9 (-CH-CH<sub>3</sub>), 67.3 (-CH<sub>2</sub>O-), 74.3 (-CH-OAc), 74.4 (-CH-OAc), 84.2 (-CH-O-), 114.5 (-C=CH<sub>2</sub>), 127.6 (-Ph-C<sub>m</sub>), 127.7 (-Ph-C<sub>m</sub>), 128.5 (-Ph-C<sub>o</sub>), 128.7 (-Ph-C<sub>o</sub>), 129.0 (-Ph-C<sub>p</sub>), 129.2 (-Ph-C<sub>p</sub>), 129.4 (-HC=C-CH<sub>3</sub>), 130.3 (-HC=C-CH<sub>3</sub>), 133.7 (-Ph-C<sub>q</sub>), 134.0 (-Ph-C<sub>q</sub>), 136.3 (-CH=C-

# Supplementary Material (ESI) for Chemical Communications  
# This journal is (c) The Royal Society of Chemistry 2006

CH<sub>3</sub>), 140.8 (-CH=C-CH<sub>3</sub>), 143.9 (-C=CH<sub>2</sub>), 167.6 (C=O), 168.3 (C=O), 169.9 (C=O), 170.1 (C=O) ppm;

**HRMS (ESI) m/z (M+Na)<sup>+</sup>**: obsd. 627.2928, calcd 627.2934 for C<sub>36</sub>H<sub>44</sub>NaO<sub>8</sub>;

### (*S,S*)-**C**

**R<sub>f</sub>** 0.27 (hexane/CH<sub>2</sub>Cl<sub>2</sub>/ethyl acetate, 3:3:0.25);

[α]<sub>D</sub><sup>26</sup> +62.2 (c 3.2 in CHCl<sub>3</sub>);

**<sup>1</sup>H NMR (500 MHz, CDCl<sub>3</sub>)**: δ 0.82 (3H, d, *J* = 6.95 Hz, -CH-CH<sub>3</sub>), 1.09 (9H, s, -C(CH<sub>3</sub>)<sub>3</sub>), 1.28 (3H, d, *J* = 1.4 Hz, -C-CH<sub>3</sub>), 1.64 (3H, d, *J* = 0.95 Hz, -C-CH<sub>3</sub>), 2.15 (3H, s, -OAc), 2.20 (3H, s, -OAc), 2.35 (1H, dq, *J* = 9.75, 6.95 Hz, -CH-CH<sub>3</sub>), 4.57 (3H, s, -OAc), 4.66 (1H, d, *J* = 12.95 Hz, -CH<sub>2</sub>-O-), 4.95 (1H, d, *J* = 9.75 Hz, -CH-O-), 4.98 (1H, s, -C=CH<sub>2</sub>-), 5.01 (1H, s, -C=CH<sub>2</sub>), 5.06 (1H, t, *J* = 1.4 Hz, -C=CH-), 5.62 (1H, s, -C=CH-), 5.88 (1H, s, -CH-OAc), 5.98 (1H, s, -CH-OAc), 7.32-7.34 (3H, m, -Ph-H), 7.36-7.39 (5H, m, -Ph-H), 7.48-7.50 (2H, m, -Ph-H) ppm;

**<sup>13</sup>C NMR (125 MHz, CDCl<sub>3</sub>)**: δ 12.4 (-C-CH<sub>3</sub>), 16.7 (OAc), 17.5 (OAc), 20.6 (-C-CH<sub>3</sub>), 30.8 (-C(CH<sub>3</sub>)<sub>3</sub>), 32.5 (-C(CH<sub>3</sub>)<sub>3</sub>), 38.4 (-CH-CH<sub>3</sub>), 67.9 (-CH<sub>2</sub>O-), 74.3 (-CH-OAc), 74.5 (-CH-OAc), 84.5 (-CH-O-), 114.5 (-C=CH<sub>2</sub>), 127.6 (-Ph-C<sub>m</sub>), 127.7 (-Ph-C<sub>m</sub>), 128.5 (-Ph-C<sub>o</sub>), 128.7 (-Ph-C<sub>o</sub>), 129.0 (-Ph-C<sub>p</sub>), 129.2 (-Ph-C<sub>p</sub>), 129.4, (-HC=C-CH<sub>3</sub>), 130.3 (-HC=C-CH<sub>3</sub>), 133.7 (-Ph-C<sub>q</sub>), 134.0 (-Ph-C<sub>q</sub>), 136.3 (-CH=C-CH<sub>3</sub>), 140.8 (-CH=C-CH<sub>3</sub>), 143.9 (-C=CH<sub>2</sub>), 167.6 (C=O), 168.2 (C=O), 169.9 (C=O), 170.1 (C=O) ppm;

**HRMS (ESI) m/z (M+Na)<sup>+</sup>**: obsd 627.2928, calcd 627.2934 for C<sub>36</sub>H<sub>44</sub>NaO<sub>8</sub>.

### *Anti*-(*3R,4R,5E,7E*)-3,5,7,9,9-pentamethyl-2-methylenedeca-5,7-diene-1,4-diol (**17b**)

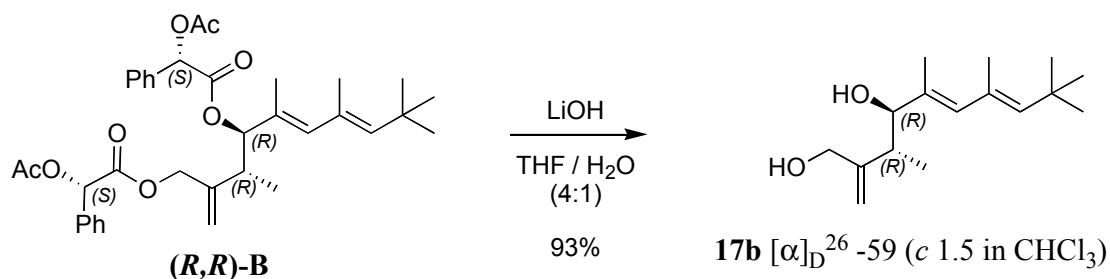

To a solution of (*R,R*)-**B** (40 mg, 0.066 mmol) in THF (1 mL) at 0 °C was added a solution of LiOH (6 mg, 0.14 mmol) in water (1 mL). The resulting mixture was stirred at room temperature for 12 h prior to workup. The mixture was extracted with

ethyl acetate (x5). The combined organic extract was dried over anhydrous Na<sub>2</sub>SO<sub>4</sub>, filtered and concentrated to afford the desired product **17b** (15.6 mg, 93%) as a white amorphous solid.

**R<sub>f</sub>** 0.40 (hexane/ethyl acetate, 2:1);

$[\alpha]_D^{26}$  -59 (*c* 1.5 in CHCl<sub>3</sub>);

**<sup>1</sup>H NMR (500 MHz, CDCl<sub>3</sub>):** δ 0.94 (3H, d, *J* = 6.95 Hz, -CH-CH<sub>3</sub>), 1.13 (9H, s, -C(CH<sub>3</sub>)<sub>3</sub>), 1.73 (3H, d, *J* = 1.4 Hz, -C-CH<sub>3</sub>), 1.81 (3H, d, *J* = 0.95 Hz, -C-CH<sub>3</sub>), 2.27 (2H, brs, -CH<sub>2</sub>OH, -CHOH), 2.48 (1H, dq, *J* = 9.25, 6.95 Hz, -CH-CH<sub>3</sub>), 3.82 (1H, d, *J* = 9.25 Hz, -CH-OH), 4.10 (1H, dd, *J* = 12.47, 0.95 Hz, -CH<sub>2</sub>-OH), 4.15 (1H, dd, *J* = 12.47, 0.95 Hz, -CH<sub>2</sub>-OH), 5.05 (1H, s, -C=CH-), 5.19 (1H, d, *J* = 0.95 Hz, -C=CH<sub>2</sub>), 5.31 (1H, d, *J* = 0.95 Hz, -C=CH<sub>2</sub>), 5.83 (1H, s, -C=CH-) ppm;

**<sup>13</sup>C NMR (125 MHz, CDCl<sub>3</sub>):** δ 12.1 (-CH-CH<sub>3</sub>), 17.6 (-C-CH<sub>3</sub>), 17.9 (-C-CH<sub>3</sub>), 30.9 (-C(CH<sub>3</sub>)<sub>3</sub>), 32.6 (-C(CH<sub>3</sub>)<sub>3</sub>), 41.2 (-CH-CH<sub>3</sub>), 65.6 (-CH<sub>2</sub>OH), 83.1 (-CHOH), 112.8 (-C=CH<sub>2</sub>), 130.7 (-C=CH-), 134.3 (-C=CH-), 134.5 (-C=CH-), 140.6 (-C=CH-), 151.5 (-C=CH<sub>2</sub>) ppm;

**IR (neat, cm<sup>-1</sup>):** 3353, 2958, 1743, 1643;

**HRMS (ESI) m/z (M<sup>+</sup>-1):** obsd 251.2011, calcd 251.2011 for C<sub>16</sub>H<sub>27</sub>O<sub>2</sub>.

***Anti*-(3*S*,4*S*,5*E*,7*E*)-3,5,7,9,9-pentamethyl-2-methylenedeca-5,7-diene-1,4-diol  
(17c)**

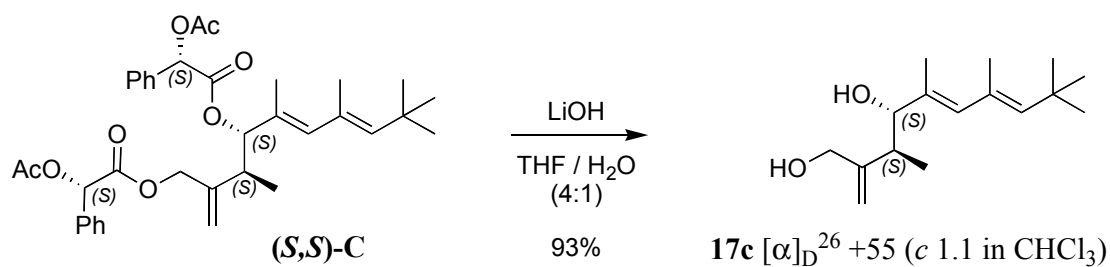

Follow the same hydrolysis procedure for **17b**, **17c** was obtained as a white amorphous solid in 93% yield.

**R<sub>f</sub>** 0.40 (hexane/ethyl acetate, 2:1);

$[\alpha]_D^{26}$  +55 (*c* 1.1 in CHCl<sub>3</sub>);

**<sup>1</sup>H NMR (500 MHz, CDCl<sub>3</sub>):** δ 0.94 (3H, d, *J* = 6.95 Hz, -CH-CH<sub>3</sub>), 1.13 (9H, s, -C(CH<sub>3</sub>)<sub>3</sub>), 1.73 (3H, d, *J* = 1.4 Hz, -C-CH<sub>3</sub>), 1.81 (3H, d, *J* = 0.95 Hz, -C-CH<sub>3</sub>), 2.27 (2H, brs, -CH<sub>2</sub>OH, -CHOH), 2.48 (1H, dq, *J* = 9.25, 6.95 Hz, -CH-CH<sub>3</sub>), 3.82 (1H, d, *J* = 9.25 Hz, -CH-OH), 4.10 (1H, dd, *J* = 12.47, 0.95 Hz, -CH<sub>2</sub>-OH), 4.15 (1H, dd, *J* =

# Supplementary Material (ESI) for Chemical Communications  
# This journal is (c) The Royal Society of Chemistry 2006

12.47, 0.95 Hz, -CH<sub>2</sub>-OH), 5.05 (1H, s, -C=CH-), 5.19 (1H, d, *J* = 0.95 Hz, -C=CH<sub>2</sub>),  
5.31 (1H, d, *J* = 0.95 Hz, -C=CH<sub>2</sub>), 5.83 (1H, s, -C=CH-) ppm;

<sup>13</sup>C NMR (125 MHz, CDCl<sub>3</sub>): δ 12.1 (-CH-CH<sub>3</sub>), 17.6 (-C-CH<sub>3</sub>), 17.9 (-C-CH<sub>3</sub>),  
30.9 (-C(CH<sub>3</sub>)<sub>3</sub>), 32.6 (-C(CH<sub>3</sub>)<sub>3</sub>), 41.2 (-CH-CH<sub>3</sub>), 65.6 (-CH<sub>2</sub>OH), 83.1 (-CHOH),  
112.8 (-C=CH<sub>2</sub>), 130.7 (-C=CH-), 134.3 (-C=CH-), 134.5 (-C=CH-), 140.6 (-C=CH-),  
151.5 (-C=CH<sub>2</sub>) ppm;

IR (neat, cm<sup>-1</sup>): 3353, 2958, 1743, 1643;

HRMS (ESI) *m/z* (*M*<sup>+</sup>-1): obsd 251.2011, calcd 251.2011 for C<sub>16</sub>H<sub>27</sub>O<sub>2</sub>.

***Anti*-ethyl (3*R*,4*R*,5*E*,7*E*)-4-hydroxy-3,5,7,9,9-pentamethyl-2-methylenedeca-5,7-dienyl carbonate (18b)**

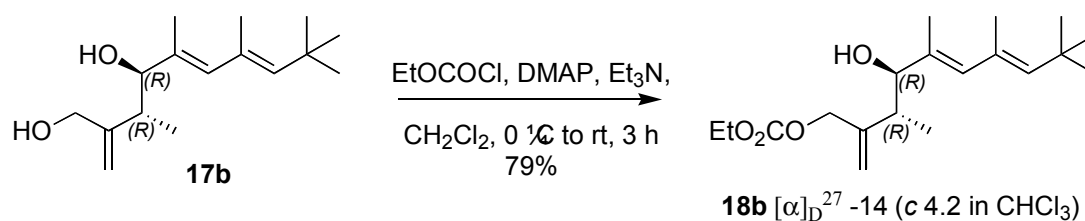

To a solution of *anti* **17b** (0.31 g, 1.23 mmol), anhydrous triethyl amine (0.51 mL, 3.69 mmol) and DMAP (0.15 g, 1.23 mmol) in CH<sub>2</sub>Cl<sub>2</sub> (12 ml) at 0 °C was added ethyl chloroformate (0.117 ml, 1.23 mmol) dropwise. The reaction progress was monitored by TLC. After completion, the reaction mixture was poured into ice water and extracted with ethyl acetate (x3). The combined organic extracts were washed with NaHCO<sub>3</sub>, brine, dried (MgSO<sub>4</sub>) and concentrated in *vacuo*. Purification by flash chromatography on silica gel afforded **18b** (0.31 g, 79%) as colorless oil.

*R<sub>f</sub>* 0.42 (hexane/ethyl acetate, 4:1);

[ $\alpha$ ]<sub>D</sub><sup>27</sup> -14 (*c* 4.2 in CHCl<sub>3</sub>);

<sup>1</sup>H NMR (500 MHz, CDCl<sub>3</sub>): δ 0.95 (3H, d, *J* = 7.40 Hz, -CH-CH<sub>3</sub>), 1.14 (9H, s, -C(CH<sub>3</sub>)<sub>3</sub>), 1.31 (3H, t, *J* = 6.95 Hz, -OCH<sub>2</sub>-CH<sub>3</sub>), 1.73 (3H, d, *J* = 1.40 Hz, -C-CH<sub>3</sub>), 1.81 (3H, d, *J* = 1.40 Hz, -C-CH<sub>3</sub>), 2.45 (1H, dq, *J* = 9.25, 7.4 Hz, -CH-CH<sub>3</sub>), 3.85 (1H, d, *J* = 9.25, 1.85 Hz, -CHOH), 4.21 (2H, q, *J* = 6.95 Hz, -CH<sub>2</sub>-CH<sub>3</sub>-), 4.66 (2H, s, -CH<sub>2</sub>-O-), 5.15 (1H, s, -C=CH<sub>2</sub>), 5.25 (1H, d, *J* = 0.95 Hz, -C=CH<sub>2</sub>), 5.31 (1H, d, *J* = 0.95 Hz, -C=CH-), 5.83 (1H, s, -C=CH-) ppm;

<sup>13</sup>C NMR (75 MHz, CDCl<sub>3</sub>): δ 11.9 (-CH<sub>3</sub>), 14.2 (-CH<sub>3</sub>), 16.9 (-CH<sub>3</sub>), 17.8 (-CH<sub>3</sub>), 30.9 (-C(CH<sub>3</sub>)<sub>3</sub>), 32.5 (-C(CH<sub>3</sub>)<sub>3</sub>), 41.8 (-CHCH<sub>3</sub>), 64.1 (-OCH<sub>2</sub>CH<sub>3</sub>), 68.7 (-

# Supplementary Material (ESI) for Chemical Communications  
# This journal is (c) The Royal Society of Chemistry 2006

CH<sub>2</sub>OCO<sub>2</sub>Et), 81.8 (-CHOH), 113.9 (-C=CH<sub>2</sub>), 130.6 (-HC=C-), 133.9 (-HC=C-),  
134.4 (-C=CH-), 140.4 (-C=CH-), 145.9 (-C=CH<sub>2</sub>), 155.0 (C=O) ppm;

**IR (neat, cm<sup>-1</sup>):** 3500, 2959, 1747, 1732, 1651;

**HRMS (EI) m/z (M<sup>+</sup>):** obsd 324.2295, calcd 324.2310 for C<sub>19</sub>H<sub>32</sub>O<sub>4</sub>.

***Anti*-(3*R*,4*R*,5*E*,7*E*)-4-(*tert*-butyldiphenylsilyloxy)-3,5,7,9,9-pentamethyl-2-methylenedeca-5,7-dienyl ethyl carbonate (**19b**)**

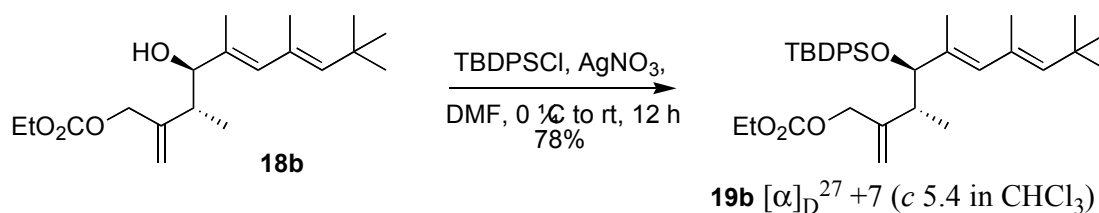

To a solution of **18b** (0.2 g, 0.6 mmol) in 1 mL DMF was added AgNO<sub>3</sub> (0.2 g, 1.2 mmol) followed by TBDPSCI (0.18 mL, 0.66 mmol). After the reaction was completed (monitored by TLC), the reaction mixture was poured into ice water and extracted with ethyl acetate. The combined organic layer was washed with brine, dried over anhydrous MgSO<sub>4</sub>, concentrated in *vacuo* and purified by flash chromatography to afford **19b** (0.263 g, 78%) as a colorless oil.

**R<sub>f</sub>** 0.55 (hexane/ethyl acetate, 4:1);

[ $\alpha$ ]<sub>D</sub><sup>27</sup> +7 (*c* 5.4 in CHCl<sub>3</sub>);

**<sup>1</sup>H NMR (500 MHz, CDCl<sub>3</sub>):**  $\delta$  0.84 (3H, d, *J* = 7.35 Hz, -CH-CH<sub>3</sub>), 1.02 (9H, s, -C(CH<sub>3</sub>)<sub>3</sub>), 1.08 (9H, s, -C(CH<sub>3</sub>)<sub>3</sub>), 1.31 (3H, t, *J* = 6.95 Hz, -OCH<sub>2</sub>CH<sub>3</sub>), 1.55 (3H, s, -C-CH<sub>3</sub>), 1.57 (3H, dd, *J* = 4.15, 1.4 Hz, -C-CH<sub>3</sub>), 2.42 (1H, dq, *J* = 8.30, 7.35 Hz, -CH-CH<sub>3</sub>), 3.94 (1H, d, *J* = 8.30 Hz, -CH-O-), 4.19 (2H, q, *J* = 6.95 Hz, -OCH<sub>2</sub>CH<sub>3</sub>), 4.43 (1H, d, *J* = 13.45 Hz, -CH<sub>2</sub>OCO<sub>2</sub>Et), 4.52 (1H, d, *J* = 13.45 Hz, -CH<sub>2</sub>OCO<sub>2</sub>Et), 4.91 (1H, s, -C=CH<sub>2</sub>-), 4.98 (1H, t, *J* = 1.40 Hz, -C=CH-), 5.08 (1H, d, *J* = 0.95 Hz, -C=CH<sub>2</sub>-), 5.39 (1H, s, -C=CH-), 7.28-7.41 (6H, m, -Ph-H), 7.58-7.64 (4H, m, -Ph-H) ppm;

**<sup>13</sup>C NMR (75 MHz, CDCl<sub>3</sub>):**  $\delta$  13.0 (-CH<sub>3</sub>), 14.2 (-CH<sub>3</sub>), 16.9 (-CH<sub>3</sub>), 17.6 (-CH<sub>3</sub>), 19.4 (-C(CH<sub>3</sub>)<sub>3</sub>), 27.1 (-C(CH<sub>3</sub>)<sub>3</sub>), 30.9 (-C(CH<sub>3</sub>)<sub>3</sub>), 32.4 (-C(CH<sub>3</sub>)<sub>3</sub>), 42.1 (-CHCH<sub>3</sub>), 63.7 (-OCH<sub>2</sub>-), 69.9 (-CH<sub>2</sub>O-), 83.7 (-CHOTBDPS), 113.0 (-C=CH<sub>2</sub>), 127.0 (Ph-C x4), 129.3 (Ph-C x2), 130.5 (-CH=C-), 133.7 (Ph-C<sub>q</sub> x2), 133.9 (-C=CH-), 134.2 (-C=CH-), 136.2 (Ph-C x4), 139.7 (-CH=C-), 145.8 (-C=CH<sub>2</sub>), 154.9 (C=O) ppm;

**IR (neat cm<sup>-1</sup>):** 2929, 2859, 1756, 1663;

**HRMS (EI) m/z (M<sup>+</sup>):** obsd 562.3489, calcd 562.3478 for C<sub>35</sub>H<sub>50</sub>O<sub>4</sub>Si.

***Anti*-(3*R*,4*R*,5*E*,7*E*)-4-(*tert*-butyldiphenylsilyloxy)-3,5,7,9,9-pentamethyl-2-methylenedeca-5,7-dien-1-ol (20b)**

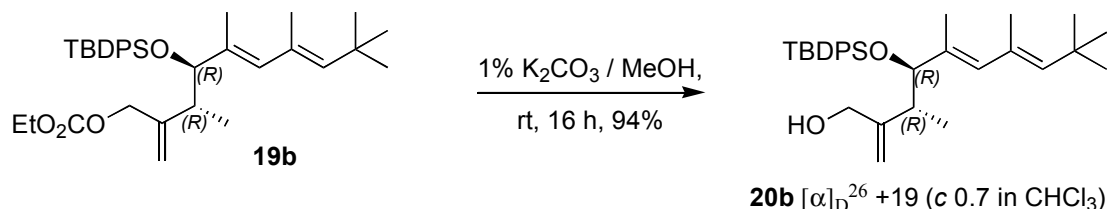

**19b** (0.25 g, 0.44 mmol) was dissolved in 1% K<sub>2</sub>CO<sub>3</sub> in MeOH solution at room temperature. The solution was stirred at room temperature for 16h. After the reaction was completed (monitored by TLC), the solution was neutralized to pH=7 using 1M HCl. The mixture was extracted with ethyl acetate. The combined organic extracts were washed with brine, dried over anhydrous MgSO<sub>4</sub> and concentrated in *vacuo*. The residue was purified by flash chromatography on silica gel to afford **20b** (0.20 g, 94%) as colorless oil.

**R<sub>f</sub>** 0.22 (hexane/ethyl acetate, 4:1);

[ $\alpha$ ]<sub>D</sub><sup>26</sup> +19 (c 0.7 in CHCl<sub>3</sub>);

**<sup>1</sup>H NMR (300 MHz, CDCl<sub>3</sub>):**  $\delta$  0.83 (3H, d, *J* = 6.96 Hz, -CH-CH<sub>3</sub>), 1.04 (9H, s, -C(CH<sub>3</sub>)<sub>3</sub>), 1.10 (9H, s, -C(CH<sub>3</sub>)<sub>3</sub>), 1.59 (3H, s, -C-CH<sub>3</sub>), 1.62 (3H, s, -C-CH<sub>3</sub>), 2.46 (1H, dq, *J* = 8.7, 6.96 Hz, -CH-CH<sub>3</sub>), 3.90 (1H, d, *J* = 14.28 Hz, -CH<sub>2</sub>OH), 3.93 (1H, d, *J* = 8.7 Hz, -CH-O-), 4.03 (1H, d, *J* = 14.28 Hz, -CH<sub>2</sub>OH), 4.84 (1H, s, -C=CH<sub>2</sub>), 5.01 (2H, d, *J* = 1.38 Hz, -C=CH-, -C=CH<sub>2</sub>), 5.38 (1H, s, -C=CH-), 7.29-7.43 (6H, m, -Ph-H), 7.60-7.68 (4H, m, -Ph-H) ppm;

**<sup>13</sup>C NMR (75 MHz, CDCl<sub>3</sub>):**  $\delta$  12.3 (-CH<sub>3</sub>), 17.2 (-CH<sub>3</sub>), 17.6 (-CH<sub>3</sub>), 19.4 (-C(CH<sub>3</sub>)<sub>3</sub>), 27.1 (-C(CH<sub>3</sub>)<sub>3</sub>), 30.9 (-C(CH<sub>3</sub>)<sub>3</sub>), 32.4 (-C(CH<sub>3</sub>)<sub>3</sub>), 41.5 (-CHCH<sub>3</sub>), 65.7 (-CH<sub>2</sub>OTBDPS), 84.4 (-CHOH), 110.0 (-C=CH<sub>2</sub>), 127.1 (Ph-C x2), 127.2 (Ph-C x2), 129.4 (Ph-C x1), 129.5 (Ph-C x1), 130.6 (-C=C-), 133.8 (-C=C-), 133.9 (-C=C-), 134.0 (-C=C-), 134.3 (-C=CH-), 136.3 (Ph-C x2), 136.3 (Ph-C x2), 139.8 (-C=CH-), 151.4 (-C=CH<sub>2</sub>) ppm;

**IR (neat cm<sup>-1</sup>):** 3354, 2958, 2874, 1654;

**HRMS (EI) m/z (M<sup>+</sup>):** obsd 490.3288, calcd 490.3267 for C<sub>32</sub>H<sub>46</sub>O<sub>2</sub>Si.

**Anti-((3*R*,4*R*,5*E*,7*E*)-2-(bromomethyl)-3,5,7,9,9-pentamethyldeca-1,5,7-trien-4-yloxy)(*tert*-butyl)diphenylsilane (21b)**

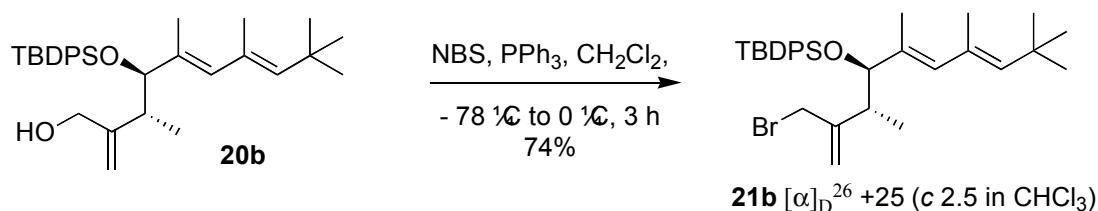

To a solution of **20b** (97.6 mg, 0.21 mmol) in anhydrous  $\text{CH}_2\text{Cl}_2$  (3 mL) at  $-78\text{ }^\circ\text{C}$  was added triphenylphosphine (81 mg, 0.31 mmol) in one portion. The mixture was stirred at  $-78\text{ }^\circ\text{C}$  for 10 minutes until all the triphenylphosphine dissolved and NBS (47 mg, 0.264 mmol) was added in one portion. The resulting solution was stirred at  $-78\text{ }^\circ\text{C}$  for 30 minutes and  $0\text{ }^\circ\text{C}$  for 15 minutes. After all the starting material had been consumed (monitored by TLC), ether and  $\text{H}_2\text{O}$  was added in. The mixture was partitioned. The organic layer was washed with brine, dried over anhydrous  $\text{MgSO}_4$  and concentrated in *vacuo*. Purification through flash chromatography on silica gel afforded **21b** (88.6 mg, 74%) as a colorless oil.

$R_f$  0.79 (hexane/ethyl acetate; 4:1);

$[\alpha]_D^{26} +25$  (c 2.5 in  $\text{CHCl}_3$ );

$^1\text{H NMR}$  (500 MHz,  $\text{CDCl}_3$ ):  $\delta$  0.93 (3H, d,  $J = 6.95$  Hz,  $-\text{CH}-\text{CH}_3$ ), 1.06 (9H, s,  $-\text{C}(\text{CH}_3)_3$ ), 1.12 (9H, s,  $-\text{C}(\text{CH}_3)_3$ ), 1.60 (3H, s,  $-\text{C}-\text{CH}_3$ ), 1.63 (3H, s,  $-\text{C}-\text{CH}_3$ ), 2.62 (1H, dq,  $J = 8.3, 6.95$  Hz,  $-\text{CH}-\text{CH}_3$ ), 3.92 (1H, d,  $J = 9.75$  Hz,  $-\text{CH}_2-\text{Br}$ ), 3.98 (1H, d,  $J = 8.3$  Hz,  $-\text{CH}-\text{O}-$ ), 4.02 (1H,  $J = 9.75$  Hz,  $-\text{CH}_2-\text{Br}$ ), 4.94 (1H, s,  $-\text{C}=\text{CH}_2-$ ), 5.02 (1H, s,  $-\text{C}=\text{CH}-$ ), 5.19 (1H, s,  $-\text{C}=\text{CH}_2$ ), 5.43 (1H, s,  $-\text{C}=\text{CH}-$ ), 7.33-7.43 (6H, m, Ph-H), 7.62-7.67 (4H, m, Ph-H) ppm;

$^{13}\text{C NMR}$  (125 MHz,  $\text{CDCl}_3$ ):  $\delta$  13.1 ( $-\text{CH}_3$ ), 17.6 ( $-\text{CH}_3$ ), 17.9 ( $-\text{CH}_3$ ), 27.2 ( $-\text{C}(\text{CH}_3)_3$ ), 30.9 ( $-\text{C}(\text{CH}_3)_3$ ), 31.9 ( $-\text{C}(\text{CH}_3)_3$ ), 32.5 ( $-\text{C}(\text{CH}_3)_3$ ), 38.8 ( $-\text{CH}_2\text{Br}$ ), 41.9 ( $-\text{CHCH}_3$ ), 84.9 ( $-\text{CHOTBDPS}$ ), 115.6 ( $-\text{C}=\text{CH}_2$ ), 127.1 (Ph-C x2), 127.2 (Ph-C x2), 129.4 (Ph-C), 129.5 (Ph-C), 130.5 ( $-\text{C}=\text{C}-$ ), 133.8 ( $-\text{C}=\text{C}-$ ), 133.9 ( $-\text{C}=\text{C}-$ ), 134.1 ( $-\text{C}=\text{C}-$ ), 134.4 ( $-\text{C}=\text{CH}-$ ), 136.2 (Ph-C x2), 136.2 (Ph-C x2), 139.9 ( $-\text{C}=\text{CH}-$ ), 148.7 ( $-\text{C}=\text{CH}_2$ ) ppm;

IR (neat  $\text{cm}^{-1}$ ): 2957, 2859, 1636, 1479;

HRMS (EI)  $m/z$  [ $\text{M}-(\text{C}_4\text{H}_9)^+$ ]: obsd 497.1723, calcd 497.1750 for  $\text{C}_{28}\text{H}_{36}\text{OSi}^{81}\text{Br}$ .

**Anti-(4*R*,5*R*,6*E*,8*E*)-5-(*tert*-butyldiphenylsilyloxy)-4,6,8,10,10-pentamethyl-3-methyleneundeca-6,8-dien-1-ol (22b)**

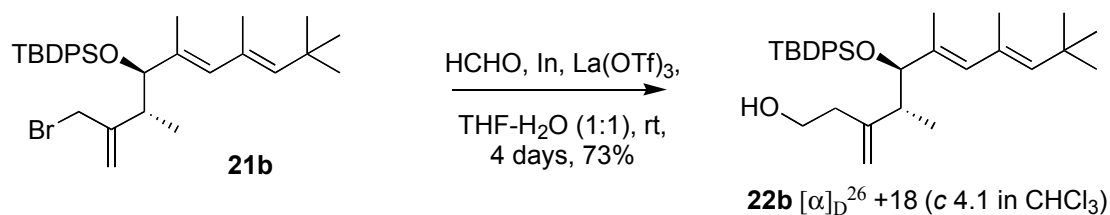

To a mixture of **21b** (0.4 g, 0.72 mmol) and formaldehyde solution (35-40% in water) (1 ml) in THF (1 mL) were added indium (88 mg, 0.72 mmol) and La(OTf)<sub>3</sub> (0.42 g, 0.72 mmol). The mixture was stirred vigorously at room temperature for 4 days. After the reaction was completed (monitored by TLC), the reaction mixture was extracted with ethyl acetate. The organic extracts were combined and washed with NaHCO<sub>3</sub> solution, brine and dried over anhydrous MgSO<sub>4</sub> and concentrated in *vacuo*. The crude product was purified by flash chromatography on silica gel. Elution with 5% ethyl acetate in hexane resulted **22b** (0.27 g, 73%) as a colorless oil.

**R<sub>f</sub>** 0.31 (hexane/ethyl acetate, 4:1);

$[\alpha]_D^{26} +18$  (c 4.1 in CHCl<sub>3</sub>);

**<sup>1</sup>H NMR (500 MHz, CDCl<sub>3</sub>):**  $\delta$  0.84 (3H, d,  $J = 7.4$  Hz, -CH-CH<sub>3</sub>), 1.08 (9H, s, -C(CH<sub>3</sub>)<sub>3</sub>), 1.14 (9H, s, -C(CH<sub>3</sub>)<sub>3</sub>), 1.63 (3H, d,  $J = 1.4$  Hz, -C-CH<sub>3</sub>), 1.65 (3H, d,  $J = 0.9$  Hz, -C-CH<sub>3</sub>), 2.06 (1H, dt,  $J = 14.75, 5.55$  Hz, -CH<sub>2</sub>-CH<sub>2</sub>-OH), 2.21 (1H, dt,  $J = 14.75, 6.95$  Hz, -CH<sub>2</sub>-CH<sub>2</sub>-OH), 2.43 (1H, dq,  $J = 8.3, 7.4$  Hz, -CH-CH<sub>3</sub>), 3.61 (2H, td,  $J = 7.15, 1.4$  Hz, -CH<sub>2</sub>-OH), 4.00 (1H, d,  $J = 8.3$  Hz, -CH-OTBDPS), 4.81 (1H, d,  $J = 1.4$  Hz, -C=CH<sub>2</sub>-), 4.89 (1H, s, -C=CH-), 5.06 (1H, t,  $J = 1.4$  Hz, -C=CH<sub>2</sub>), 5.46 (1H, s, -C=CH-), 7.32-7.43 (6H, m, -Ph-H), 7.64-7.72 (4H, m, -Ph-H) ppm;

**<sup>13</sup>C NMR (125 MHz, CDCl<sub>3</sub>):**  $\delta$  13.3 (-CH<sub>3</sub>), 16.8 (-CH<sub>3</sub>), 17.6 (-CH<sub>3</sub>), 19.4 (-C(CH<sub>3</sub>)<sub>3</sub>), 27.1 (-C(CH<sub>3</sub>)<sub>3</sub>), 30.9 (-C(CH<sub>3</sub>)<sub>3</sub>), 32.4 (-C(CH<sub>3</sub>)<sub>3</sub>), 38.2 (-CH<sub>2</sub>CH<sub>2</sub>OH), 44.7 (-CHCH<sub>3</sub>), 60.6 (-CH<sub>2</sub>OH), 83.2 (-CHOTBDPS), 111.8 (-C=CH<sub>2</sub>), 127.0 (-Ph-C x2), 127.2 (-Ph-C x2), 129.2 (-Ph-C), 129.3 (-Ph-C), 130.6 (-C=C-), 133.8 (-C=C-), 134.1 (-C=CH-), 134.2 (-Ph-C<sub>q</sub>), 134.2 (-Ph-C<sub>q</sub>), 136.2 (-Ph-C x2), 136.3 (-Ph-C x2), 139.7 (-C=CH-), 148.5 (-C=CH<sub>2</sub>) ppm;

**IR (neat cm<sup>-1</sup>):** 3436, 2935, 2843, 1638, 1457;

**HRMS (EI) m/z (M<sup>+</sup>):** obsd 504.3408, calcd 504.3424 for C<sub>33</sub>H<sub>48</sub>O<sub>2</sub>Si.



***Anti*-(4*R*,5*R*,6*E*,8*E*)-4,6,8,10,10-pentamethyl-3-methyleneundeca-6,8-diene-1,5-diol**

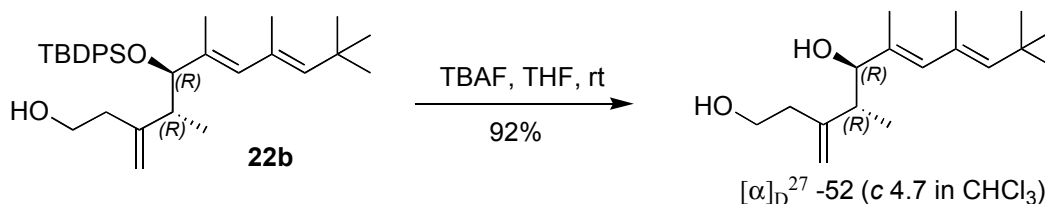

Follow the standard desilylation of the TBDPS protecting group with TBAF in THF, diol was obtained as a colourless oil in 92% yield.

**R<sub>f</sub>** 0.39 (hexane/ethyl acetate, 2:1);

[ $\alpha$ ]<sub>D</sub><sup>27</sup> -52 (c 4.7 in CHCl<sub>3</sub>);

**<sup>1</sup>H NMR (300 MHz, CDCl<sub>3</sub>):**  $\delta$  0.85 (3H, d,  $J$  = 7.32 Hz, -CH-CH<sub>3</sub>), 1.12 (9H, s, -C(CH<sub>3</sub>)<sub>3</sub>), 1.71 (3H, s, -C-CH<sub>3</sub>), 1.79 (3H, s, -C-CH<sub>3</sub>), 2.22-2.38 (2H, m, -CH<sub>2</sub>-CH<sub>2</sub>OH), 2.39 (1H, dq,  $J$  = 10.08, 7.32 Hz, -CH-CH<sub>3</sub>), 2.51 (1H, brs, -OH), 3.00 (1H, brs, -OH), 3.69-3.80 (2H, m, -CH<sub>2</sub>-OH), 3.83 (1H, d,  $J$  = 10.08 Hz, -CH-OH), 4.99 (1H, s, -C=CH<sub>2</sub>-), 5.04 (1H, s, -C=CH<sub>2</sub>), 5.29 (1H, s, -C=CH-), 5.81 (1H, s, -C=CH-) ppm;

**<sup>13</sup>C NMR (75 MHz, CDCl<sub>3</sub>):**  $\delta$  11.8 (-CH<sub>3</sub>), 17.5 (-CH<sub>3</sub>), 17.8 (-CH<sub>3</sub>), 30.8 (-C(CH<sub>3</sub>)<sub>3</sub>), 32.5 (-C(CH<sub>3</sub>)<sub>3</sub>), 37.0 (-CH<sub>2</sub>CH<sub>2</sub>OH), 43.4 (-CHCH<sub>3</sub>), 60.8 (-CH<sub>2</sub>OH), 82.0 (-CHOH), 112.9 (-C=CH<sub>2</sub>), 130.6 (-C=CH), 134.1 (-C=CH), 134.6 (-C=CH), 140.5 (-C=CH), 149.2 (-C=CH<sub>2</sub>) ppm;

**IR (neat, cm<sup>-1</sup>):** 3364, 2958, 2863, 2384, 2349, 1641, 1459, 1442;

**HRMS (EI) m/z (M<sup>+</sup>):** obsd 266.2244, calcd 266.2246 for C<sub>17</sub>H<sub>30</sub>O<sub>2</sub>.

***Anti*-(4*R*,5*R*,6*E*,8*E*)-1-(*tert*-butyldiphenylsilyloxy)-4,6,8,10,10-pentamethyl-3-methyleneundeca-6,8-dien-5-ol (**11b**)**

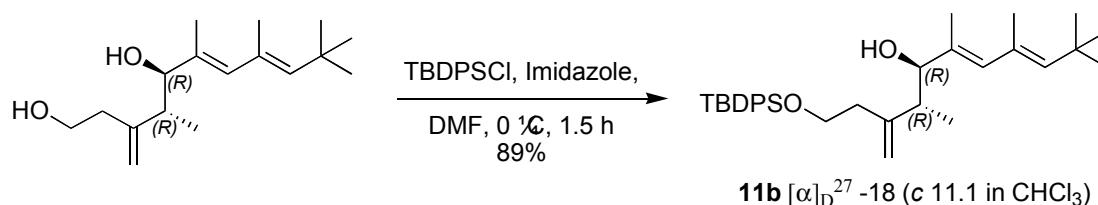

Follow the standard procedure for TBDPS protection with TBDPSCl and imidazole in DMF, **11b** was obtained as a colourless oil in 89% yield.

**R<sub>f</sub>** 0.78 (hexane/ethyl acetate, 4:1);

[ $\alpha$ ]<sub>D</sub><sup>27</sup> -18 (c 11.1 in CHCl<sub>3</sub>);

# Supplementary Material (ESI) for Chemical Communications  
# This journal is (c) The Royal Society of Chemistry 2006

**<sup>1</sup>H NMR (500 MHz, CDCl<sub>3</sub>):** δ 0.83 (3H, d, *J* = 6.95 Hz, -CH-CH<sub>3</sub>), 1.05 (9H, s, -C(CH<sub>3</sub>)<sub>3</sub>), 1.15 (9H, s, -C(CH<sub>3</sub>)<sub>3</sub>), 1.72 (3H, d, *J* = 1.4 Hz, -C-CH<sub>3</sub>), 1.82 (3H, d, *J* = 1.4 Hz, -C-CH<sub>3</sub>), 2.23-2.30 (2H, m, -CH<sub>2</sub>-C-), 2.33 (1H, dq, *J* = 9.70, 6.95 Hz, -CH-CH<sub>3</sub>), 3.74 (1H, d, *J* = 9.70 Hz, -CH-OH), 3.77-3.86 (2H, m, -CH<sub>2</sub>OTBDPS), 4.94 (1H, s, -C=CH-), 5.01 (1H, s, -C=CH<sub>2</sub>), 5.32 (1H, s, -C=CH<sub>2</sub>-), 5.81 (1H, s, -C=CH-), 7.37-7.43 (6H, m, -Ph-H), 7.68-7.70 (4H, m, -Ph-H) ppm;

**<sup>13</sup>C NMR (75 MHz, CDCl<sub>3</sub>):** δ 12.0 (-CH<sub>3</sub>), 16.9 (-CH<sub>3</sub>), 18.0 (-CH<sub>3</sub>), 19.2 (-C(CH<sub>3</sub>)<sub>3</sub>), 26.9 (-C(CH<sub>3</sub>)<sub>3</sub>), 31.0 (-C(CH<sub>3</sub>)<sub>3</sub>), 32.6 (-C(CH<sub>3</sub>)<sub>3</sub>), 36.2 (-CH<sub>2</sub>CH<sub>2</sub>OTBDPS), 44.9 (-CH-CH<sub>3</sub>), 62.9 (-CH<sub>2</sub>OTBDPS), 81.0 (-CHOH), 113.3 (-C=CH<sub>2</sub>), 127.7 (-Ph-C x4), 129.7 (-Ph-C x2), 130.8 (-C=CH-), 133.8 (-C=CH-), 133.9 (-Ph-C<sub>q</sub> x2), 134.5 (-C=CH-), 135.6 (-Ph-C x4), 140.3 (-C=CH-), 148.6 (-C=CH<sub>2</sub>) ppm;

**IR (neat, cm<sup>-1</sup>):** 3426, 3073, 3051, 2960, 2931, 1639, 1462, 1428;

**HRMS (EI) m/z (M<sup>+</sup>):** obsd 504.3420, calcd 504.3424 for C<sub>33</sub>H<sub>48</sub>SiO<sub>2</sub>.

***Syn*-(6*E*,8*E*)-1-(*tert*-butyldiphenylsilyloxy)-4,6,8,10,10-pentamethyl-3-methyleneundeca-6,8-dien-5-ol (**9**)**

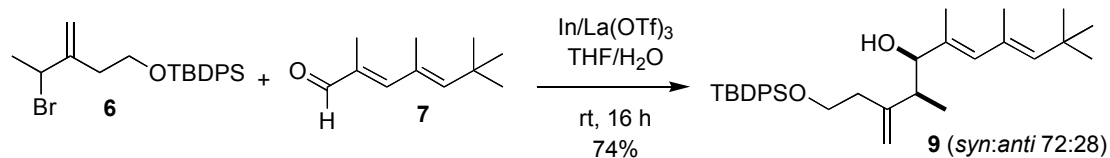

To a stirred solution of **6** (1.25 g, 3 mmol) in THF/H<sub>2</sub>O (1:1) (10 mL) was added indium (0.52 g, 4.5 mmol). After vigorous stirring for 30 minutes at room temperature, La(OTf)<sub>3</sub> (1.76 g, 3 mmol) and **7** (0.5 g, 3 mmol) were added. The mixture was stirred vigorously at room temperature for 16h. After the reaction was completed (monitored by TLC), the reaction mixture was extracted with ethyl acetate. The organic extracts were combined and washed with *sat.* NaHCO<sub>3</sub> solution, brine, dried over anhydrous Na<sub>2</sub>SO<sub>4</sub>, and concentrated in *vacuo*. The crude product was purified by flash chromatography on silica gel, eluting with 1% ethyl acetate in hexane resulted **9** (1.12 g, 74%) as a colorless oil, *syn/anti* isomer is in the ratio of 72:28.

**R<sub>f</sub>** 0.75 (hexane/ethyl acetate, 4:1);

**<sup>1</sup>H NMR (300 MHz, CDCl<sub>3</sub>):** δ 0.95 (3H, d, *J* = 6.96 Hz, -CH-CH<sub>3</sub>), 1.05 (9H, s, -C(CH<sub>3</sub>)<sub>3</sub>), 1.14 (9H, s, -C(CH<sub>3</sub>)<sub>3</sub>), 1.65 (3H, d, *J* = 1.05 Hz, -C-CH<sub>3</sub>), 1.78 (3H, d, *J* =

# Supplementary Material (ESI) for Chemical Communications  
# This journal is (c) The Royal Society of Chemistry 2006

1.05 Hz, -C-CH<sub>3</sub>), 2.28-2.42 (3H, m, -CH<sub>2</sub>CH<sub>2</sub>OTBDPS, -CH-CH<sub>3</sub>), 3.78 (2H, t, *J* = 6.96 Hz, -CH<sub>2</sub>OTBDPS), 3.94 (1H, d, *J* = 4.89 Hz, -CH-OH), 4.88 (1H, d, *J* = 1.05 Hz, -C=CH<sub>2</sub>-), 4.90 (1H, d, *J* = 1.05 Hz, -C=CH<sub>2</sub>), 5.25 (1H, t, *J* = 1.05 Hz, -C=CH-), 5.86 (1H, s, -C=CH-), 7.36-7.43 (6H, m, -Ph-H), 7.66-7.69 (4H, m, -Ph-H) ppm;

<sup>13</sup>C NMR (75 MHz, CDCl<sub>3</sub>): δ 13.0 (-CH<sub>3</sub>), 14.4 (-CH<sub>3</sub>), 18.1 (-CH<sub>3</sub>), 19.2 (-C(CH<sub>3</sub>)<sub>3</sub>), 26.9 (-C(CH<sub>3</sub>)<sub>3</sub>), 31.0 (-C(CH<sub>3</sub>)<sub>3</sub>), 32.6 (-C(CH<sub>3</sub>)<sub>3</sub>), 37.8 (-CH<sub>2</sub>CH<sub>2</sub>OTBDPS), 43.1 (-CH-CH<sub>3</sub>), 63.4 (-CH<sub>2</sub>OTBDPS), 81.0 (-CHOH), 112.1 (-C=CH<sub>2</sub>), 127.7 (-Ph-C x4), 129.6 (-Ph-C x2), 131.1 (-C=CH-), 131.3 (-C=CH-), 133.8 (-C=CH-), 134.1 (-Ph-C<sub>q</sub>), 135.6 (-Ph-C x4), 139.8 (-C=CH-), 149.0 (-C=CH<sub>2</sub>) ppm;

IR (neat, cm<sup>-1</sup>): 3466, 3073, 2958, 2860, 1742, 1641, 1469, 1428;

HRMS (EI) *m/z* (M<sup>+</sup>): obsd 504.3408, calcd 504.3424 for C<sub>33</sub>H<sub>48</sub>SiO<sub>2</sub>.

**(6*E*,8*E*)-1-(*tert*-butyldiphenylsilyloxy)-4,6,8,10,10-pentamethyl-3-methyleneundeca-6,8-dien-5-one (10)**

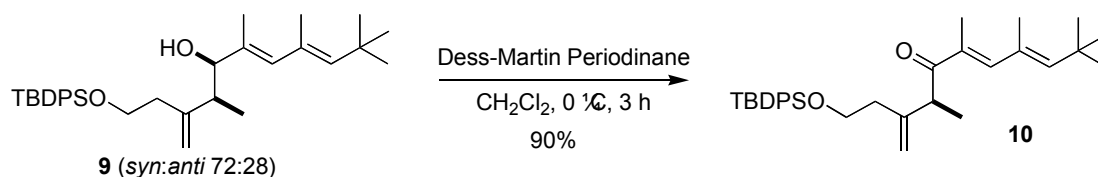

To a solution of Dess-Martin reagent (1.39 g, 3.27 mmol) in anhydrous CH<sub>2</sub>Cl<sub>2</sub> (10 mL) was added dropwise of **9** (1.1 g, 2.18 mmol) prediluted in CH<sub>2</sub>Cl<sub>2</sub> (5 mL) at 0 °C. The reaction mixture was stirred under nitrogen at 0 °C for 3h. After completion, the reaction mixture was diluted with ether and poured slowly into a Na<sub>2</sub>S<sub>2</sub>O<sub>3</sub> : NaHCO<sub>3</sub> (1:1) solution and stirred for 10 minutes and extract with ether. The combine etherate layer was washed with NaHCO<sub>3</sub>, brine and dried over anhydrous MgSO<sub>4</sub>. Solvent was removed by concentration in *vacuo*. The residue was purified by flash chromatography on silica gel to provide **10** (0.99 g, (90%)) as a colorless oil.

*R<sub>f</sub>* 0.85 (hexane/ethyl acetate; 4:1);

<sup>1</sup>H NMR (300 MHz, CDCl<sub>3</sub>): δ 1.04 (9H, s, -C(CH<sub>3</sub>)<sub>3</sub>), 1.16 (9H, s, -C(CH<sub>3</sub>)<sub>3</sub>), 1.19 (3H, d, *J* = 6.96 Hz, -CH-CH<sub>3</sub>), 1.87 (3H, d, *J* = 1.05 Hz, -C-CH<sub>3</sub>), 1.88 (3H, d, *J* = 1.41 Hz, -C-CH<sub>3</sub>), 2.23 (1H, dt, *J* = 14.64, 6.96 Hz, -CH<sub>2</sub>CH<sub>2</sub>OTBDPS), 2.34 (1H, dt, *J* = 14.64, 6.96 Hz, -CH<sub>2</sub>CH<sub>2</sub>OTBDPS), 3.77 (2H, t, *J* = 6.96 Hz, -CH<sub>2</sub>OTBDPS), 3.89 (1H, q, *J* = 6.96 Hz, -CH-CH<sub>3</sub>), 4.87 (2H, s, -C=CH<sub>2</sub>), 5.52 (1H, s, -C=CH-), 6.92 (1H, s, -C=CH-), 7.35-7.45 (6H, m, -Ph-H), 7.65-7.68 (4H, m, -Ph-H) ppm;

<sup>13</sup>C NMR (75 MHz, CDCl<sub>3</sub>): δ 13.5 (-CH<sub>3</sub>), 17.0 (-CH<sub>3</sub>), 17.5 (-CH<sub>3</sub>), 19.2 (-C(CH<sub>3</sub>)<sub>3</sub>), 26.9 (-C(CH<sub>3</sub>)<sub>3</sub>), 30.7 (-C(CH<sub>3</sub>)<sub>3</sub>), 33.1 (-C(CH<sub>3</sub>)<sub>3</sub>), 37.6 (-CH<sub>2</sub>CH<sub>2</sub>OTBDPS), 46.8 (-CH-CH<sub>3</sub>), 63.1 (-CH<sub>2</sub>OTBDPS), 112.8 (-C=CH<sub>2</sub>), 127.7 (-Ph-C x4), 129.6 (-Ph-C x2), 131.0 (-C=CH-), 133.9 (-Ph-C<sub>q</sub> x2), 134.0 (-C=CH-), 135.6 (-Ph-C x4), 144.8 (-C=CH-), 145.3 (-C=CH-), 146.8 (-C=CH<sub>2</sub>), 203.5 (-C=O) ppm;

IR (neat, cm<sup>-1</sup>): 3067, 3051, 2958, 2930, 2858, 1736, 1586, 1429;

HRMS (EI) m/z [M-(C<sub>4</sub>H<sub>9</sub>)]<sup>+</sup>: obsd 445.2549, calcd 445.2563 for C<sub>29</sub>H<sub>37</sub>SiO<sub>2</sub>.

***Anti*-(6*E*,8*E*)-1-(*tert*-butyldiphenylsilyloxy)-4,6,8,10,10-pentamethyl-3-methyleneundeca-6,8-dien-5-ol (**11**)**

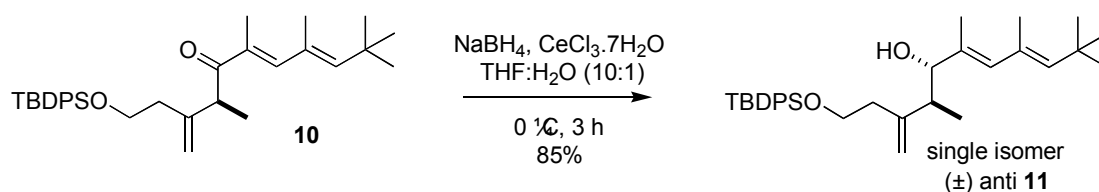

To a solution of **10** (1.1 g, 2.2 mmol) in THF:H<sub>2</sub>O (10:1) (10 mL) was added in CeCl<sub>3</sub>·7H<sub>2</sub>O (1.64 g, 4.4 mmol) at 0 °C. After the mixture was stirred at 0 °C for 15 minutes, NaBH<sub>4</sub> (0.16 g, 4.4 mmol) was added and the reaction was stirred for 3 h. After the reaction was completed (monitored by TLC), THF was removed under *vacuo*. H<sub>2</sub>O was added in and the mixture was extracted with ether. The combined etherate layer was washed with brine, dried over MgSO<sub>4</sub>, concentrated and purified through flash chromatography on silica gel to afford *anti* **11** (0.94 g, 85%) as a colorless oil. (*anti:syn* > 99:1)

R<sub>f</sub> 0.78 (hexane/ethyl acetate, 4:1);

<sup>1</sup>H NMR (500 MHz, CDCl<sub>3</sub>): δ 0.83 (3H, d, *J* = 6.95 Hz, -CH-CH<sub>3</sub>), 1.05 (9H, s, -C(CH<sub>3</sub>)<sub>3</sub>), 1.15 (9H, s, -C(CH<sub>3</sub>)<sub>3</sub>), 1.72 (3H, d, *J* = 1.4 Hz, -C-CH<sub>3</sub>), 1.82 (3H, d, *J* = 1.4 Hz, -C-CH<sub>3</sub>), 2.23-2.30 (2H, m, -CH<sub>2</sub>-C-), 2.33 (1H, dq, *J* = 9.70, 6.95 Hz, -CH-CH<sub>3</sub>), 3.74 (1H, d, *J* = 9.70 Hz, -CH-OH), 3.77-3.86 (2H, m, -CH<sub>2</sub>OTBDPS), 4.94 (1H, s, -C=CH-), 5.01 (1H, s, -C=CH<sub>2</sub>), 5.32 (1H, s, -C=CH<sub>2</sub>-), 5.81 (1H, s, -C=CH-), 7.37-7.43 (6H, m, -Ph-H), 7.68-7.70 (4H, m, -Ph-H) ppm;

<sup>13</sup>C NMR (75 MHz, CDCl<sub>3</sub>): δ 12.0 (-CH<sub>3</sub>), 16.9 (-CH<sub>3</sub>), 18.0 (-CH<sub>3</sub>), 19.2 (-C(CH<sub>3</sub>)<sub>3</sub>), 26.9 (-C(CH<sub>3</sub>)<sub>3</sub>), 31.0 (-C(CH<sub>3</sub>)<sub>3</sub>), 32.6 (-C(CH<sub>3</sub>)<sub>3</sub>), 36.2 (-CH<sub>2</sub>CH<sub>2</sub>OTBDPS), 44.9 (-CH-CH<sub>3</sub>), 62.9 (-CH<sub>2</sub>OTBDPS), 81.0 (-CHOH), 113.3 (-C=CH<sub>2</sub>), 127.7 (-Ph-C x4), 129.7 (-Ph-C x2), 130.8 (-C=CH-), 133.8 (-C=CH-),

# Supplementary Material (ESI) for Chemical Communications  
# This journal is (c) The Royal Society of Chemistry 2006

133.9 (-Ph-Cq x2), 134.5 (-C=CH-), 135.6 (-Ph-C x4), 140.3 (-C=CH-), 148.6 (-C=CH<sub>2</sub>) ppm;

**IR (neat, cm<sup>-1</sup>):** 3426, 3073, 3051, 2960, 2931, 1639, 1462, 1428;

**HRMS (EI) m/z (M<sup>+</sup>):** obsd 504.3420, calcd 504.3424 for C<sub>33</sub>H<sub>48</sub>SiO<sub>2</sub>.

***Anti*-(6*E*,8*E*)-4,6,8,10,10-pentamethyl-3-methyleneundeca-6,8-diene-1,5-diol**

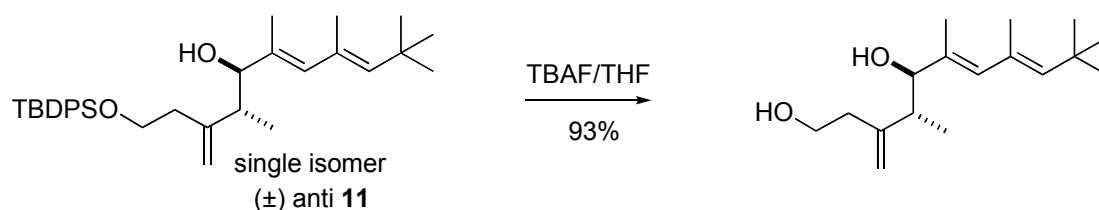

Follow the standard desilylation procedure using TBAF in THF afforded *anti* diol as colourless oil in 93% yield.

**R<sub>f</sub>** 0.39 (hexane/ethyl acetate, 2:1);

**<sup>1</sup>H NMR (300 MHz, CDCl<sub>3</sub>):** δ 0.85 (3H, d, *J* = 7.32 Hz, -CH-CH<sub>3</sub>), 1.12 (9H, s, -C(CH<sub>3</sub>)<sub>3</sub>), 1.71 (3H, s, -C-CH<sub>3</sub>), 1.79 (3H, s, -C-CH<sub>3</sub>), 2.22-2.38 (2H, m, -CH<sub>2</sub>-CH<sub>2</sub>OH), 2.39 (1H, dq, *J* = 10.08, 7.32 Hz, -CH-CH<sub>3</sub>), 2.51 (1H, brs, -OH), 3.00 (1H, brs, -OH), 3.69-3.80 (2H, m, -CH<sub>2</sub>-OH), 3.83 (1H, d, *J* = 10.08 Hz, -CH-OH), 4.99 (1H, s, -C=CH<sub>2</sub>-), 5.04 (1H, s, -C=CH<sub>2</sub>), 5.29 (1H, s, -C=CH-), 5.81 (1H, s, -C=CH-) ppm;

**<sup>13</sup>C NMR (75 MHz, CDCl<sub>3</sub>):** δ 11.8 (-CH<sub>3</sub>), 17.5 (-CH<sub>3</sub>), 17.8 (-CH<sub>3</sub>), 30.8 (-C(CH<sub>3</sub>)<sub>3</sub>), 32.5 (-C(CH<sub>3</sub>)<sub>3</sub>), 37.0 (-CH<sub>2</sub>CH<sub>2</sub>OH), 43.4 (-CHCH<sub>3</sub>), 60.8 (-CH<sub>2</sub>OH), 82.0 (-CHOH), 112.9 (-C=CH<sub>2</sub>), 130.6 (-C=CH), 134.1 (-C=CH), 134.6 (-C=CH), 140.5 (-C=CH), 149.2 (-C=CH<sub>2</sub>) ppm;

**IR (neat, cm<sup>-1</sup>):** 3364, 2958, 2863, 2384, 2349, 1641, 1459, 1442;

**HRMS (EI) m/z (M<sup>+</sup>):** obsd 266.2244, calcd 266.2246 for C<sub>17</sub>H<sub>30</sub>O<sub>2</sub>.

***Anti*-(1*S*,1'*S*)-2,2'-((4*R*,5*R*,6*E*,8*E*)-4,6,8,10,10-pentamethyl-3-methyleneundeca-6,8-diene-1,5-diyl)bis(oxy)bis(2-oxo-1-phenylethane-2,1-diyl) diacetate (*R,R*)-B and *Anti*-(1*S*,1'*S*)-2,2'-((4*S*,5*S*,6*E*,8*E*)-4,6,8,10,10-pentamethyl-3-methyleneundeca-6,8-diene-1,5-diyl)bis(oxy)bis(2-oxo-1-phenylethane-2,1-diyl) diacetate (*S,S*)-C**

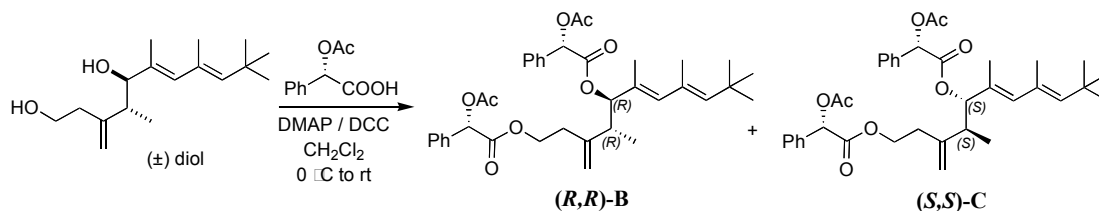

To a mixture of *anti* (±)-diol (0.19 g, 0.71 mmol), *S*-(+)- $\alpha$ -acetoxyphenylacetic acid (0.42 g, 2.13 mmol) and DMAP (9 mg, 0.071 mmol) in dried  $\text{CH}_2\text{Cl}_2$  (3 mL) was added in DCC (0.37 g, 1.77 mmol) prediluted in 1 mL  $\text{CH}_2\text{Cl}_2$  dropwise at 0 °C. The reaction mixture was stirred at 0 °C to room temperature for 12h. After completion,  $\text{CH}_2\text{Cl}_2$  was removed *via* rotary evaporator and the crude product was directly subjected to column chromatography. Purification by flash chromatography on silica gel (Hex: $\text{CH}_2\text{Cl}_2$ :EA, 3:3:0.2) afforded two pure enantiomer as colorless oil with 97% overall yield.

**(*R,R*)-B**

$R_f$  0.37 (hexane/ $\text{CH}_2\text{Cl}_2$ /ethyl acetate, 3:3:0.2);

$^1\text{H NMR}$  (300 MHz,  $\text{CDCl}_3$ ):  $\delta$  0.76 (3H, d,  $J = 7.29$  Hz, -CH- $\text{CH}_3$ ), 1.14 (9H, s, -C( $\text{CH}_3$ ) $_3$ ), 1.70 (3H, d,  $J = 1.05$  Hz, -C- $\text{CH}_3$ ), 1.78 (3H, d,  $J = 1.05$  Hz, -C- $\text{CH}_3$ ), 2.13 (3H, s, -OAc), 2.19 (3H, s, -OAc), 2.23-2.40 (3H, m, - $\text{CH}_2\text{CH}_2\text{O}$ -, -CH- $\text{CH}_3$ ), 3.82 (1H, dt,  $J = 10.44, 7.65$  Hz, - $\text{CH}_2\text{CH}_2\text{O}$ -), 3.97 (1H, dt,  $J = 10.44, 7.32$  Hz, - $\text{CH}_2\text{CH}_2\text{O}$ -), 4.34 (1H, s, -C= $\text{CH}_2$ -), 4.57 (1H, s, -C= $\text{CH}_2$ ), 4.97 (1H, d,  $J = 10.08$  Hz, -CH-O-), 5.27 (1H, s, -C= $\text{CH}$ -), 5.85 (1H, s, -CH-OAc), 5.88 (1H, s, -CH-OAc), 5.89 (1H, s, -C= $\text{CH}$ -), 7.26-7.28 (3H, m, -Ph-H), 7.35-7.40 (5H, m, -Ph-H), 7.45-7.47 (2H, m, -Ph-H) ppm;

$^{13}\text{C NMR}$  (75 MHz,  $\text{CDCl}_3$ ):  $\delta$  12.8 (- $\text{CH}_3$ ), 16.8 (- $\text{CH}_3$ ), 17.7 (- $\text{CH}_3$ ), 20.6 (- $\text{CH}_3$ ), 30.8 (-C( $\text{CH}_3$ ) $_3$ ), 32.1 (- $\text{CH}_2\text{CH}_2\text{O}$ -), 32.5 (-C( $\text{CH}_3$ ) $_3$ ), 42.0 (-CH- $\text{CH}_3$ ), 63.9 (- $\text{CH}_2\text{O}$ -), 74.4 (-CH-OAc), 74.5 (-CH-OAc), 84.1 (-CH-O-), 111.8 (-C= $\text{CH}_2$ ), 127.6 (-Ph-C $_m$  x2), 127.8 (-Ph-C $_m$  x2), 128.5 (-Ph-C $_o$  x2), 128.7 (-Ph-C $_o$  x2), 129.0 (-Ph-C $_p$ ), 129.1 (-Ph-C $_p$ ), 129.6 (-HC=C- $\text{CH}_3$ ), 130.4 (-HC=C- $\text{CH}_3$ ), 133.7 (-Ph-C $_q$ ), 134.1 (-Ph-C $_q$ ),

136.4 (-CH=C-CH<sub>3</sub>), 140.8 (-CH=C-CH<sub>3</sub>), 145.6 (-C=CH<sub>2</sub>), 167.6 (C=O), 168.6 (C=O), 169.9 (C=O), 170.2 (C=O) ppm;

**(S,S)-C**

**R<sub>f</sub>** 0.26 (hexane/CH<sub>2</sub>Cl<sub>2</sub>/ethyl acetate, 3:3:0.2);

**<sup>1</sup>H NMR (300 MHz, CDCl<sub>3</sub>):** δ 0.85 (3H, d, *J* = 7.32 Hz, -CH-CH<sub>3</sub>), 1.12 (9H, s, -C(CH<sub>3</sub>)<sub>3</sub>), 1.36 (3H, d, *J* = 1.05 Hz, -C-CH<sub>3</sub>), 1.68 (3H, d, *J* = 1.05 Hz, -C-CH<sub>3</sub>), 2.16 (3H, s, -OAc), 2.20 (3H, s, -OAc), 2.40-2.71 (3H, m, -CH<sub>2</sub>CH<sub>2</sub>O-, -CH-CH<sub>3</sub>), 4.21-4.30 (2H, m, -CH<sub>2</sub>-O-), 4.75 (1H, s, -C=CH<sub>2</sub>-), 4.88 (1H, s, -C=CH<sub>2</sub>-), 5.02 (1H, d, *J* = 10.11 Hz, -CH-O-), 5.11 (1H, s, -C=CH-), 5.73 (1H, s, -C=CH-), 5.89 (1H, s, -CH-OAc), 5.96 (1H, s, -CH-OAc), 7.33-7.41 (6H, m, -Ph-H), 7.49-7.52 (4H, m, -Ph-H) ppm;

**<sup>13</sup>C NMR (125 MHz, CDCl<sub>3</sub>):** δ 12.3 (-CH<sub>3</sub>), 16.8 (-CH<sub>3</sub>), 17.5 (-CH<sub>3</sub>), 20.5 (-CH<sub>3</sub>), 30.7 (-C(CH<sub>3</sub>)<sub>3</sub>), 32.4 (-C(CH<sub>3</sub>)<sub>3</sub>), 33.3 (-CH<sub>2</sub>CH<sub>2</sub>O-), 41.3 (-CH-CH<sub>3</sub>), 63.9 (-CH<sub>2</sub>O-), 74.2 (-CH-OAc), 74.4 (-CH-OAc), 84.3 (-CH-O-), 112.3 (-C=CH<sub>2</sub>), 127.5 (-Ph-C<sub>m</sub> x2), 127.6 (-Ph-C<sub>m</sub> x2), 128.4 (-Ph-C<sub>o</sub> x2), 128.6 (-Ph-C<sub>o</sub> x2), 128.9 (-Ph-C<sub>p</sub>), 129.0 (-Ph-C<sub>p</sub>), 129.4, (-HC=C-CH<sub>3</sub>), 130.2 (-HC=C-CH<sub>3</sub>), 133.8 (-Ph-C<sub>q</sub>), 133.9 (-Ph-C<sub>q</sub>), 136.2 (-CH=C-CH<sub>3</sub>), 140.5 (-CH=C-CH<sub>3</sub>), 145.9 (-C=CH<sub>2</sub>), 167.6 (C=O), 168.7 (C=O), 169.8 (C=O), 170.1 (C=O) ppm;

**Anti-(4R,5R,6E,8E)-4,6,8,10,10-pentamethyl-3-methyleneundeca-6,8-diene-1,5-diol (b)**

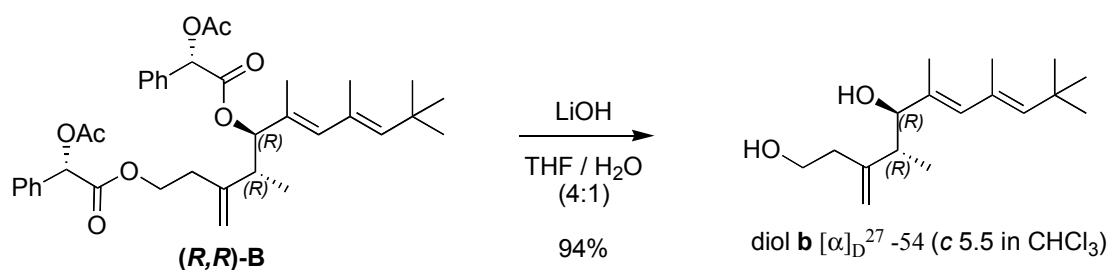

Follow the standard hydrolysis procedure, diol-**b** was obtained as a colourless oil in 94% yield.

**R<sub>f</sub>** 0.39 (hexane/ethyl acetate, 2:1);

[ $\alpha$ ]<sub>D</sub><sup>27</sup> -54 (c 5.5 in CHCl<sub>3</sub>);

**<sup>1</sup>H NMR (300 MHz, CDCl<sub>3</sub>):** δ 0.85 (3H, d, *J* = 7.32 Hz, -CH-CH<sub>3</sub>), 1.12 (9H, s, -C(CH<sub>3</sub>)<sub>3</sub>), 1.71 (3H, s, -C-CH<sub>3</sub>), 1.79 (3H, s, -C-CH<sub>3</sub>), 2.22-2.38 (2H, m, -CH<sub>2</sub>-

# Supplementary Material (ESI) for Chemical Communications  
# This journal is (c) The Royal Society of Chemistry 2006

CH<sub>2</sub>OH), 2.39 (1H, dq,  $J = 10.08, 7.32$  Hz, -CH-CH<sub>3</sub>), 2.51 (1H, brs, -OH), 3.00 (1H, brs, -OH), 3.69-3.80 (2H, m, -CH<sub>2</sub>-OH), 3.83 (1H, d,  $J = 10.08$  Hz, -CH-OH), 4.99 (1H, s, -C=CH<sub>2</sub>-), 5.04 (1H, s, -C=CH<sub>2</sub>), 5.29 (1H, s, -C=CH-), 5.81 (1H, s, -C=CH-) ppm;

<sup>13</sup>C NMR (75 MHz, CDCl<sub>3</sub>):  $\delta$  11.8 (-CH<sub>3</sub>), 17.5 (-CH<sub>3</sub>), 17.8 (-CH<sub>3</sub>), 30.8 (-C(CH<sub>3</sub>)<sub>3</sub>), 32.5 (-C(CH<sub>3</sub>)<sub>3</sub>), 37.0 (-CH<sub>2</sub>CH<sub>2</sub>OH), 43.4 (-CHCH<sub>3</sub>), 60.8 (-CH<sub>2</sub>OH), 82.0 (-CHOH), 112.9 (-C=CH<sub>2</sub>), 130.6 (-C=CH), 134.1 (-C=CH), 134.6 (-C=CH), 140.5 (-C=CH), 149.2 (-C=CH<sub>2</sub>) ppm;

IR (neat, cm<sup>-1</sup>): 3364, 2958, 2863, 2384, 2349, 1641, 1459, 1442;

HRMS (EI)  $m/z$  (M<sup>+</sup>): obsd 266.2244, calcd 266.2246 for C<sub>17</sub>H<sub>30</sub>O<sub>2</sub>.

***Anti*-(4*S*,5*S*,6*E*,8*E*)-4,6,8,10,10-pentamethyl-3-methyleneundeca-6,8-diene-1,5-diol (c)**

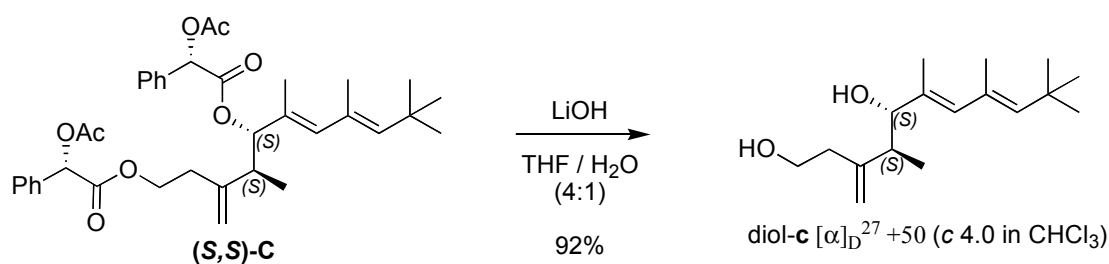

Follow the standard hydrolysis procedure, diol-c was obtained as a colourless oil in 92% yield.

$R_f$  0.39 (hexane/ethyl acetate, 2:1);

$[\alpha]_D^{26} +50$  ( $c$  4.0 in CHCl<sub>3</sub>);

<sup>1</sup>H NMR (300 MHz, CDCl<sub>3</sub>):  $\delta$  0.85 (3H, d,  $J = 7.32$  Hz, -CH-CH<sub>3</sub>), 1.12 (9H, s, -C(CH<sub>3</sub>)<sub>3</sub>), 1.71 (3H, s, -C-CH<sub>3</sub>), 1.79 (3H, s, -C-CH<sub>3</sub>), 2.22-2.38 (2H, m, -CH<sub>2</sub>-CH<sub>2</sub>OH), 2.39 (1H, dq,  $J = 10.08, 7.32$  Hz, -CH-CH<sub>3</sub>), 2.51 (1H, brs, -OH), 3.00 (1H, brs, -OH), 3.69-3.80 (2H, m, -CH<sub>2</sub>-OH), 3.83 (1H, d,  $J = 10.08$  Hz, -CH-OH), 4.99 (1H, s, -C=CH<sub>2</sub>-), 5.04 (1H, s, -C=CH<sub>2</sub>), 5.29 (1H, s, -C=CH-), 5.81 (1H, s, -C=CH-) ppm;

<sup>13</sup>C NMR (75 MHz, CDCl<sub>3</sub>):  $\delta$  11.8 (-CH<sub>3</sub>), 17.5 (-CH<sub>3</sub>), 17.8 (-CH<sub>3</sub>), 30.8 (-C(CH<sub>3</sub>)<sub>3</sub>), 32.5 (-C(CH<sub>3</sub>)<sub>3</sub>), 37.0 (-CH<sub>2</sub>CH<sub>2</sub>OH), 43.4 (-CHCH<sub>3</sub>), 60.8 (-CH<sub>2</sub>OH), 82.0 (-CHOH), 112.9 (-C=CH<sub>2</sub>), 130.6 (-C=CH), 134.1 (-C=CH), 134.6 (-C=CH), 140.5 (-C=CH), 149.2 (-C=CH<sub>2</sub>) ppm;

IR (neat, cm<sup>-1</sup>): 3364, 2958, 2863, 2384, 2349, 1641, 1459, 1442;



HRMS (EI)  $m/z$  ( $M^+$ ): obsd 266.2244, calcd 266.2246 for  $C_{17}H_{30}O_2$ .

***Anti*-(4*S*,5*S*,6*E*,8*E*)-1-(*tert*-butyldiphenylsilyloxy)-4,6,8,10,10-pentamethyl-3-methyleneundeca-6,8-dien-5-ol (11c)**

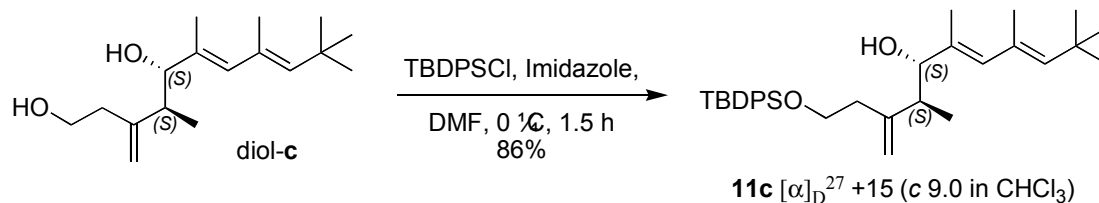

Follow the standard TBDPS protection using TBDPSCl and imidazole in DMF, **11c** was obtained as a colourless oil in 86% yield.

$R_f$  0.78 (hexane/ethyl acetate, 4:1);

$[\alpha]_D^{27} +15$  ( $c$  9.0 in  $CHCl_3$ );

**$^1H$  NMR (500 MHz,  $CDCl_3$ ):**  $\delta$  0.83 (3H, d,  $J = 6.95$  Hz, -CH- $CH_3$ ), 1.05 (9H, s, -C( $CH_3$ ) $_3$ ), 1.15 (9H, s, -C( $CH_3$ ) $_3$ ), 1.72 (3H, d,  $J = 1.4$  Hz, -C- $CH_3$ ), 1.82 (3H, d,  $J = 1.4$  Hz, -C- $CH_3$ ), 2.23-2.30 (2H, m, - $CH_2$ -C-), 2.33 (1H, dq,  $J = 9.70, 6.95$  Hz, -CH- $CH_3$ ), 3.74 (1H, d,  $J = 9.70$  Hz, -CH-OH), 3.77-3.86 (2H, m, - $CH_2$ OTBDPS), 4.94 (1H, s, -C=CH-), 5.01 (1H, s, -C=CH $_2$ ), 5.32 (1H, s, -C=CH $_2$ -), 5.81 (1H, s, -C=CH-), 7.37-7.43 (6H, m, -Ph-H), 7.68-7.70 (4H, m, -Ph-H) ppm;

**$^{13}C$  NMR (75 MHz,  $CDCl_3$ ):**  $\delta$  12.0 (- $CH_3$ ), 16.9 (- $CH_3$ ), 18.0 (- $CH_3$ ), 19.2 (-C( $CH_3$ ) $_3$ ), 26.9 (-C( $CH_3$ ) $_3$ ), 31.0 (-C( $CH_3$ ) $_3$ ), 32.6 (-C( $CH_3$ ) $_3$ ), 36.2 (- $CH_2CH_2$ OTBDPS), 44.9 (-CH- $CH_3$ ), 62.9 (- $CH_2$ OTBDPS), 81.0 (-CHOH), 113.3 (-C=CH $_2$ ), 127.7 (-Ph-C x4), 129.7 (-Ph-C x2), 130.8 (-C=CH-), 133.8 (-C=CH-), 133.9 (-Ph-C $q$  x2), 134.5 (-C=CH-), 135.6 (-Ph-C x4), 140.3 (-C=CH-), 148.6 (-C=CH $_2$ ) ppm;

**IR (neat,  $cm^{-1}$ ):** 3426, 3073, 3051, 2960, 2931, 1639, 1462, 1428;

HRMS (EI)  $m/z$  ( $M^+$ ): obsd 504.3420, calcd 504.3424 for  $C_{33}H_{48}SiO_2$ .

(5*S*,8*S*)-((4*R*,5*R*,6*E*,8*E*)-1-(*tert*-butyldiphenylsilyloxy)-4,6,8,10,10-pentamethyl-3-methyleneundeca-6,8-dien-5-yl) 5-isopropyl-6,8-dimethyl-4,7,10-trioxo-11-oxa-3,6,9-triazatetradec-13-en-1-oate (**22b**) and (5*S*,8*S*)-((4*S*,5*S*,6*E*,8*E*)-1-(*tert*-butyldiphenylsilyloxy)-4,6,8,10,10-pentamethyl-3-methyleneundeca-6,8-dien-5-yl) 5-isopropyl-6,8-dimethyl-4,7,10-trioxo-11-oxa-3,6,9-triazatetradec-13-en-1-oate (**22c**)

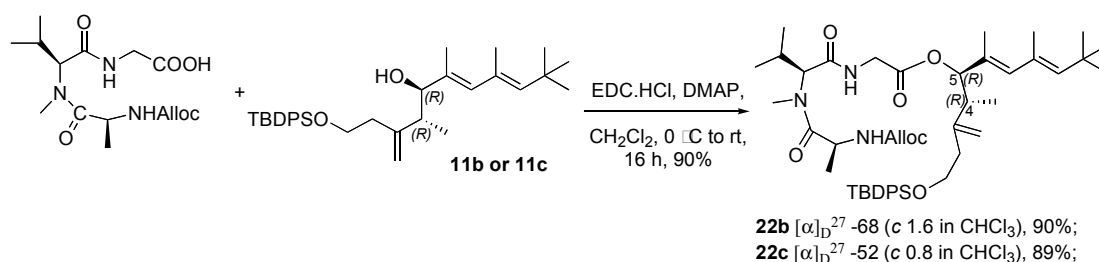

The *anti* homoallylic alcohol **11b** (0.8 g, 1.58 mmol) and tripeptide acid (1.36 g, 3.96 mmol) were dissolved in  $\text{CH}_2\text{Cl}_2$  (3 ml), and EDC.HCl (0.76 g, 3.96 mmol) was added followed by the addition of DMAP (0.097 g, 0.79 mmol) at 0 °C. The mixture was stirred for 16 h at room temperature. After completion, monitored by TLC, the reaction mixture was diluted with ether. The combined organic layer was washed with 5%  $\text{KHSO}_4$ , water, saturated  $\text{NaHCO}_3$ , brine and finally dried over anhydrous  $\text{MgSO}_4$ . After filtration, it was concentrated and purified by flash chromatography on silica gel to give **22b** (1.18 g, 90%) as a colorless oil.

### **22b**

$R_f$  0.15 (hexane/ethyl acetate, 4:1);

$[\alpha]_{\text{D}}^{27}$  -68 (c 1.6 in  $\text{CHCl}_3$ );

$^1\text{H NMR}$  (500 MHz,  $\text{CDCl}_3$ ):  $\delta$  0.82 (6H, dd,  $J = 6.95, 0.9$  Hz,  $\text{C}_{13}\text{-CH}_3$ , Val- $\text{CH}_3$ ), 0.95 (3H, d,  $J = 6.45$  Hz, Val- $\text{CH}_3$ ), 1.04 (9H, s,  $-\text{C}(\text{CH}_3)_3$ ), 1.13 (9H, s,  $-\text{C}(\text{CH}_3)_3$ ), 1.30 (3H, d,  $J = 6.95$  Hz, Ala- $\text{CH}_3$ ), 1.65 (3H, d,  $J = 1.4$  Hz,  $\text{C}_{14}\text{-CH}_3$ ), 1.77 (3H, d,  $J = 1.4$  Hz,  $-\text{C}_{15}\text{-CH}_3$ ), 2.24 (1H, d,  $J = 6.95$  Hz,  $\text{C}_2\text{-H}$ ), 2.26 (1H, d,  $J = 6.95$  Hz,  $\text{C}_2\text{-H}$ ), 2.29 (1H, m,  $\text{C}_4\text{-H}$ ), 2.44 (1H, m, Val- $(\text{CH}_3)_2\text{CH}$ ), 3.00 (3H, s, N- $\text{CH}_3$ ), 3.73 (3H, m, Gly- $\text{CH}_2$ ,  $-\text{CH}_2\text{-O-}$ ), 3.86 (1H, dd,  $J = 18.27, 6.00$  Hz, Gly- $\text{CH}_2$ ), 4.54 (2H, d,  $J = 5.1$  Hz,  $\text{CH}_2=\text{CHCH}_2\text{-}$ ), 4.62 (1H, d,  $J = 11.05$  Hz, Val- $\alpha\text{-H}$ ), 4.66 (1H, dq,  $J = 7.85, 6.95$  Hz, Ala- $\alpha\text{-H}$ ), 4.77 (1H, s,  $\text{C}_{12}\text{-H}$ ), 4.82 (1H, s,  $\text{C}_{12}\text{-H}$ ), 5.02 (1H, d,  $J = 10.2$  Hz,  $\text{C}_5\text{-H}$ ), 5.19 (1H, dd,  $J = 10.20, 1.35$  Hz,  $\text{CH}_2=\text{CHCH}_2\text{-}$ ), 5.27 (1H, s,  $\text{C}_9\text{-H}$ ), 5.28 (1H, dd,  $J = 15.95, 1.40$  Hz,  $\text{CH}_2=\text{CHCH}_2\text{-}$ ), 5.76 (1H, d,  $J = 7.85$  Hz, Ala-NH), 5.86

# Supplementary Material (ESI) for Chemical Communications

# This journal is (c) The Royal Society of Chemistry 2006

(1H, s, C<sub>7</sub>-H), 5.90 (1H, m, CH<sub>2</sub>=CHCH<sub>2</sub>-), 6.56 (1H, brs, Gly-NH), 7.38 (6H, m, -Ph-H), 7.67 (4H, m, -Ph-H) ppm;

<sup>13</sup>C NMR (125 MHz, CDCl<sub>3</sub>): δ 12.7 (-CH<sub>3</sub>), 16.7 (-CH<sub>3</sub>), 17.7 (-CH<sub>3</sub>), 18.2 (-CH<sub>3</sub>), 18.4 (-CH<sub>3</sub>), 19.1 (-C(CH<sub>3</sub>)<sub>3</sub>), 19.5 (-CH<sub>3</sub>), 25.4 (-CH-(CH<sub>3</sub>)<sub>2</sub>), 26.8 (-C(CH<sub>3</sub>)<sub>3</sub>), 30.3 (-N-CH<sub>3</sub>), 30.8 (-C(CH<sub>3</sub>)<sub>3</sub>), 32.5 (-C(CH<sub>3</sub>)<sub>3</sub>), 37.5 (-CH<sub>2</sub>-), 40.7 (-CH<sub>2</sub>-), 42.0 (-CH-), 47.1 (-CH-), 62.5 (-N-CH-), 63.3 (-CH<sub>2</sub>-O-), 65.5 (-CH<sub>2</sub>-O-), 84.1 (-CH-O-), 111.8 (-C=CH<sub>2</sub>), 117.5 (-CH=CH<sub>2</sub>), 127.5 (-Ph-C x4), 129.5 (-Ph-C x2), 129.9 (-C=CH-), 130.3 (-C=CH-), 132.7 (-CH=CH<sub>2</sub>), 133.8 (-Ph-C<sub>q</sub> x2), 135.5 (-Ph-C x4), 136.4 (-CH=C-), 141.0 (-CH=C-), 147.6 (-C=CH<sub>2</sub>-), 155.4 (-C=O), 168.2 (-C=O), 169.8 (-C=O), 173.9 (-C=O) ppm;

IR (neat, cm<sup>-1</sup>): 3313, 3073, 2961, 1726, 1689, 1640, 1529, 1464, 1428;

HRMS (ESI) m/z (M<sup>+</sup>+Na): obsd 852.4972, calcd 852.4959 for C<sub>48</sub>H<sub>71</sub>NaN<sub>3</sub>O<sub>7</sub>Si.

## 22c

R<sub>f</sub> 0.15 (hexane/ethyl acetate, 4:1);

[α]<sub>D</sub><sup>27</sup> -52 (c 0.8 in CHCl<sub>3</sub>);

<sup>1</sup>H NMR (500 MHz, CDCl<sub>3</sub>): δ 0.82 (6H, d, J = 6.95 Hz, C<sub>13</sub>-CH<sub>3</sub>, Val-CH<sub>3</sub>), 0.94 (3H, d, J = 6.50 Hz, Val-CH<sub>3</sub>), 1.04 (9H, s, -C(CH<sub>3</sub>)<sub>3</sub>), 1.13 (9H, s, -C(CH<sub>3</sub>)<sub>3</sub>), 1.31 (3H, d, J = 6.95 Hz, Ala-CH<sub>3</sub>), 1.65 (3H, d, J = 1.4 Hz, C<sub>14</sub>-CH<sub>3</sub>), 1.77 (3H, d, J = 0.9 Hz, -C<sub>15</sub>-CH<sub>3</sub>), 2.23 (1H, d, J = 6.9 Hz, C<sub>2</sub>-H), 2.24 (1H, d, J = 6.95 Hz, C<sub>2</sub>-H), 2.28 (1H, m, C<sub>4</sub>-H), 2.43 (1H, m, Val-(CH<sub>3</sub>)<sub>2</sub>CH), 3.00 (3H, s, N-CH<sub>3</sub>), 3.66 (1H, dd, J = 18.02, 4.65 Hz, Gly-CH<sub>2</sub>), 3.74 (2H, m, -CH<sub>2</sub>-O-), 3.94 (1H, dd, J = 18.02, 6.05 Hz, Gly-CH<sub>2</sub>), 4.55 (2H, d, J = 5.1 Hz, CH<sub>2</sub>=CHCH<sub>2</sub>-), 4.61 (1H, d, J = 11.10 Hz, Val-α-H), 4.66 (1H, dq, J = 8.30, 6.95 Hz, Ala-α-H), 4.76 (1H, s, C<sub>12</sub>-H), 4.81 (1H, s, C<sub>12</sub>-H), 5.02 (1H, d, J = 10.15 Hz, C<sub>5</sub>-H), 5.19 (1H, dd, J = 10.4, 1.4 Hz, CH<sub>2</sub>=CHCH<sub>2</sub>-), 5.27 (1H, s, C<sub>9</sub>-H), 5.29 (1H, dd, J = 18.45, 1.85 Hz, CH<sub>2</sub>=CHCH<sub>2</sub>-), 5.72 (1H, d, J = 8.30 Hz, Ala-NH), 5.86 (1H, s, C<sub>7</sub>-H), 5.90 (1H, m, CH<sub>2</sub>=CHCH<sub>2</sub>-), 6.46 (1H, brs, Gly-NH), 7.40 (6H, m, -Ph-H), 7.67 (4H, m, -Ph-H) ppm;

<sup>13</sup>C NMR (125 MHz, CDCl<sub>3</sub>): δ 12.7 (-CH<sub>3</sub>), 16.8 (-CH<sub>3</sub>), 17.7 (-CH<sub>3</sub>), 18.3 (-CH<sub>3</sub>), 18.4 (-CH<sub>3</sub>), 19.1 (-C(CH<sub>3</sub>)<sub>3</sub>), 19.6 (-CH<sub>3</sub>), 25.4 (-CH-(CH<sub>3</sub>)<sub>2</sub>), 26.8 (-C(CH<sub>3</sub>)<sub>3</sub>), 30.4 (-N-CH<sub>3</sub>), 30.9 (-C(CH<sub>3</sub>)<sub>3</sub>), 32.6 (-C(CH<sub>3</sub>)<sub>3</sub>), 37.4 (-CH<sub>2</sub>-), 40.8 (-CH<sub>2</sub>-), 42.1 (-CH-), 47.1 (-CH-), 62.5 (-N-CH-), 63.3 (-CH<sub>2</sub>-O-), 65.6 (-CH<sub>2</sub>-O-), 84.2 (-CH-O-), 111.7 (-C=CH<sub>2</sub>), 117.5 (-CH=CH<sub>2</sub>), 127.6 (-Ph-C x4), 129.6 (-Ph-C x2), 129.9 (-C=CH-),

130.4 (-C=CH-), 132.7 (-CH=CH<sub>2</sub>), 133.9 (-Ph-C<sub>q</sub> x2), 135.5 (-Ph-C x4), 136.5 (-CH=C-), 141.0 (-CH=C-), 147.8 (-C=CH<sub>2</sub>-), 155.4 (-C=O), 168.3 (-C=O), 169.8 (-C=O), 173.9 (-C=O) ppm;

IR (neat, cm<sup>-1</sup>): 3313, 3073, 2961, 1726, 1689, 1640, 1529, 1464, 1428;

HRMS (ESI) m/z (M<sup>+</sup>+Na): obsd 852.4972, calcd 852.4959 for C<sub>48</sub>H<sub>71</sub>NaN<sub>3</sub>O<sub>7</sub>Si.

(5*S*,8*S*)-((4*R*,5*R*,6*E*,8*E*)-1-hydroxy-4,6,8,10,10-pentamethyl-3-methyleneundeca-6,8-dien-5-yl) 5-isopropyl-6,8-dimethyl-4,7,10-trioxo-11-oxa-3,6,9-triazatetradec-13-en-1-oate (24b) and (5*S*,8*S*)-((4*S*,5*S*,6*E*,8*E*)-1-hydroxy-4,6,8,10,10-pentamethyl-3-methyleneundeca-6,8-dien-5-yl) 5-isopropyl-6,8-dimethyl-4,7,10-trioxo-11-oxa-3,6,9-triazatetradec-13-en-1-oate (24c)

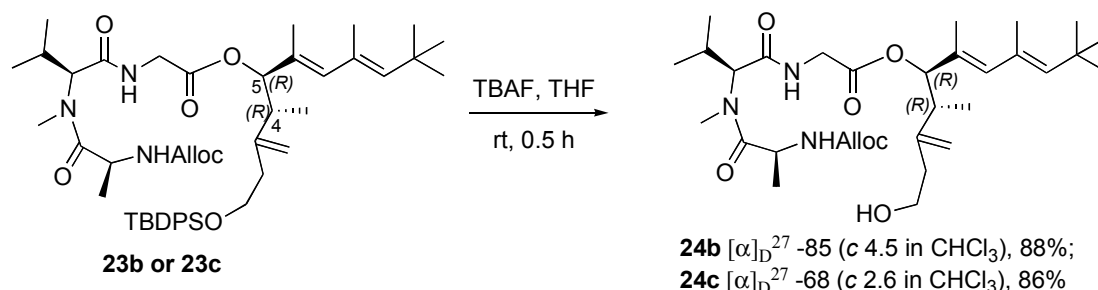

To a solution of **23** (0.092 g, 0.11 mmol) in THF (0.5 mL) was added TBAF (0.22 mL, 1.0 M in THF, 0.22 mmol). The mixture was stirred for 30 minutes at room temperature. After the reaction was completed (monitored by TLC), the mixture was concentrated in *vacuo* to remove the THF. The residue was purified by flash chromatography on silica gel to afford **24** (0.057 g, 88%) as a colorless oil.

#### 24b

R<sub>f</sub> 0.20 (hexane/ethyl acetate, 1:1);

[ $\alpha$ ]<sub>D</sub><sup>27</sup> -85 (c 4.5 in CHCl<sub>3</sub>);

<sup>1</sup>H NMR (500 MHz, CDCl<sub>3</sub>):  $\delta$  0.80 (3H, d, *J* = 6.50 Hz, Val-CH<sub>3</sub>), 0.88 (3H, d, *J* = 6.95 Hz, C<sub>13</sub>-CH<sub>3</sub>), 0.92 (3H, d, *J* = 6.45 Hz, Val-CH<sub>3</sub>), 1.10 (9H, s, -C(CH<sub>3</sub>)<sub>3</sub>), 1.31 (3H, d, *J* = 6.95 Hz, Ala-CH<sub>3</sub>), 1.67 (3H, s, C<sub>14</sub>-CH<sub>3</sub>), 1.76 (3H, s, -C<sub>15</sub>-CH<sub>3</sub>), 2.24 (2H, t, *J* = 6.00 Hz, C<sub>2</sub>-H), 2.22-2.29 (1H, m, Val-(CH<sub>3</sub>)<sub>2</sub>CH), 2.49 (1H, dq, *J* = 10.15, 6.95 Hz, C<sub>4</sub>-H), 3.00 (3H, s, N-CH<sub>3</sub>), 3.69-3.78 (3H, m, Gly-CH<sub>2</sub>, -CH<sub>2</sub>-OH), 3.98 (1H, dd, *J* = 17.83, 6.00 Hz, Gly-CH<sub>2</sub>), 4.52 (2H, d, *J* = 5.10 Hz, CH<sub>2</sub>=CHCH<sub>2</sub>O-), 4.55 (1H, d, *J* = 11.10 Hz, Val- $\alpha$ -H), 4.65 (1H, dq, *J* = 8.35, 6.95 Hz, Ala- $\alpha$ -H), 4.88 (1H, s, C<sub>12</sub>-H), 4.90 (1H, s, C<sub>12</sub>-H), 5.10 (1H, d, *J* = 10.15 Hz, C<sub>5</sub>-H), 5.17 (1H, d, *J* = 10.15 Hz, CH<sub>2</sub>=CHCH<sub>2</sub>O-), 5.26 (1H, s, C<sub>9</sub>-H), 5.27 (1H, d, *J* =

# Supplementary Material (ESI) for Chemical Communications

# This journal is (c) The Royal Society of Chemistry 2006

12.00 Hz, CH<sub>2</sub>=CHCH<sub>2</sub>O-), 5.72 (1H, d, *J* = 8.35 Hz, Ala-NH), 5.88 (1H, s, C<sub>7</sub>-H), 5.84-5.92 (1H, m, CH<sub>2</sub>=CHCH<sub>2</sub>O-), 6.83 (1H, broad t, *J* = 5.05 Hz, Gly-NH) ppm;

**<sup>13</sup>C NMR (125 MHz, CDCl<sub>3</sub>):** δ 12.5 (-CH<sub>3</sub>), 16.9 (-CH<sub>3</sub>), 17.7 (-CH<sub>3</sub>), 18.2 (-CH<sub>3</sub>), 18.3 (-CH<sub>3</sub>), 19.5 (-CH<sub>3</sub>), 25.4 (-CH-(CH<sub>3</sub>)<sub>2</sub>), 30.4 (-N-CH<sub>3</sub>), 30.8 (-C(CH<sub>3</sub>)<sub>3</sub>), 32.5 (-C(CH<sub>3</sub>)<sub>3</sub>), 37.0 (-CH<sub>2</sub>-CH<sub>2</sub>OH), 41.1 (NH-CH<sub>2</sub>-), 42.0 (-CH-CH<sub>3</sub>), 47.2 (-NH-CH-CH<sub>3</sub>), 60.2 (-CH<sub>2</sub>-O-), 62.6 (-N-CH-CH(CH<sub>3</sub>)<sub>2</sub>), 65.6 (-CH<sub>2</sub>-O-), 83.9 (-CH-O-), 111.8 (-C=CH<sub>2</sub>), 117.6 (-CH=CH<sub>2</sub>), 129.7 (-C=CH-), 130.3 (-C=CH-), 132.7 (-CH=CH<sub>2</sub>), 136.8 (-CH=C-), 141.1 (-CH=C-), 147.4 (-C=CH<sub>2</sub>-), 155.4 (-C=O), 168.3 (-C=O), 170.1 (-C=O), 174.1 (-C=O) ppm;

**IR (neat, cm<sup>-1</sup>):** 3320, 3073, 2961, 1727, 1641, 1523, 1464;

**HRMS (ESI) m/z (M<sup>+</sup>+Na):** obsd 614.3765, calcd 614. 3781 for C<sub>32</sub>H<sub>53</sub>NaN<sub>3</sub>O<sub>7</sub>.

## 24c

**R<sub>f</sub>** 0.20 (hexane/ethyl acetate, 1:1);

[α]<sub>D</sub><sup>27</sup> -68 (*c* 2.6 in CHCl<sub>3</sub>);

**<sup>1</sup>H NMR (500 MHz, CDCl<sub>3</sub>):** δ 0.81 (3H, d, *J* = 6.50 Hz, Val-CH<sub>3</sub>), 0.90 (3H, d, *J* = 6.95 Hz, C<sub>13</sub>-CH<sub>3</sub>), 0.95 (3H, d, *J* = 6.45 Hz, Val-CH<sub>3</sub>), 1.12 (9H, s, -C(CH<sub>3</sub>)<sub>3</sub>), 1.29 (3H, d, *J* = 6.95 Hz, Ala-CH<sub>3</sub>), 1.67 (3H, s, C<sub>14</sub>-CH<sub>3</sub>), 1.77 (3H, s, -C<sub>15</sub>-CH<sub>3</sub>), 2.23-2.31 (3H, m, C<sub>2</sub>-H, Val-(CH<sub>3</sub>)<sub>2</sub>CH), 2.50 (1H, dq, *J* = 10.65, 6.95 Hz, C<sub>4</sub>-H), 3.02 (3H, s, N-CH<sub>3</sub>), 3.71-3.80 (3H, m, Gly-CH<sub>2</sub>, -CH<sub>2</sub>-OH), 4.04 (1H, dd, *J* = 17.55, 6.45 Hz, Gly-CH<sub>2</sub>), 4.53 (2H, d, *J* = 6.90 Hz, CH<sub>2</sub>=CHCH<sub>2</sub>O-), 4.54 (1H, d, *J* = 10.60 Hz, Val-α-H), 4.64 (1H, dq, *J* = 8.30, 6.95 Hz, Ala-α-H), 4.89 (1H, s, C<sub>12</sub>-H), 4.91 (1H, s, C<sub>12</sub>-H), 5.13 (1H, d, *J* = 10.65 Hz, C<sub>5</sub>-H), 5.19 (1H, d, *J* = 10.65 Hz, CH<sub>2</sub>=CHCH<sub>2</sub>O-), 5.27 (1H, s, C<sub>9</sub>-H), 5.28 (1H, dd, *J* = 17.25, 1.35 Hz, CH<sub>2</sub>=CHCH<sub>2</sub>O-), 5.68 (1H, d, *J* = 8.30 Hz, Ala-NH), 5.85-5.90 (1H, m, CH<sub>2</sub>=CHCH<sub>2</sub>O-), 5.92 (1H, s, C<sub>7</sub>-H), 7.14 (1H, broad t, *J* = 5.05 Hz, Gly-NH) ppm;

**<sup>13</sup>C NMR (125 MHz, CDCl<sub>3</sub>):** δ 12.5 (-CH<sub>3</sub>), 17.3 (-CH<sub>3</sub>), 17.7 (-CH<sub>3</sub>), 18.3 (-CH<sub>3</sub>), 18.4 (-CH<sub>3</sub>), 19.5 (-CH<sub>3</sub>), 25.6 (-CH-(CH<sub>3</sub>)<sub>2</sub>), 30.5 (-N-CH<sub>3</sub>), 30.8 (-C(CH<sub>3</sub>)<sub>3</sub>), 32.6 (-C(CH<sub>3</sub>)<sub>3</sub>), 37.5 (-CH<sub>2</sub>-CH<sub>2</sub>OH), 41.1 (NH-CH<sub>2</sub>-), 41.4 (-CH-CH<sub>3</sub>), 47.1 (-NH-CH-CH<sub>3</sub>), 59.7 (-CH<sub>2</sub>-O-), 62.7 (-N-CH-CH(CH<sub>3</sub>)<sub>2</sub>), 65.6 (-CH<sub>2</sub>-O-), 84.1 (-CH-O-), 111.6 (-C=CH<sub>2</sub>), 117.6 (-CH=CH<sub>2</sub>), 129.6 (-C=CH-), 130.3 (-C=CH-), 132.7 (-CH=CH<sub>2</sub>), 136.9 (-CH=C-), 141.2 (-CH=C-), 147.5 (-C=CH<sub>2</sub>-), 155.4 (-C=O), 168.3 (-C=O), 169.6 (-C=O), 174.1 (-C=O) ppm;

# Supplementary Material (ESI) for Chemical Communications  
# This journal is (c) The Royal Society of Chemistry 2006

IR (neat,  $\text{cm}^{-1}$ ): 3320, 3073, 2961, 1727, 1641, 1523, 1464;

HRMS (ESI)  $m/z$  ( $M^+ + \text{Na}$ ): obsd 614.3765, calcd 614.3781 for  $\text{C}_{32}\text{H}_{53}\text{NaN}_3\text{O}_7$ .

(7*S*,10*S*,16*R*,17*R*)-10-isopropyl-7,9,17-trimethyl-18-methylene-5,8,11,14-tetraoxo-16-((2*E*,4*E*)-4,6,6-trimethylhepta-2,4-dien-2-yl)-4,15-dioxa-6,9,12-triazaicos-1-en-20-oic acid (**25b**) and (7*S*,10*S*,16*S*,17*S*)-10-isopropyl-7,9,17-trimethyl-18-methylene-5,8,11,14-tetraoxo-16-((2*E*,4*E*)-4,6,6-trimethylhepta-2,4-dien-2-yl)-4,15-dioxa-6,9,12-triazaicos-1-en-20-oic acid (**25c**)

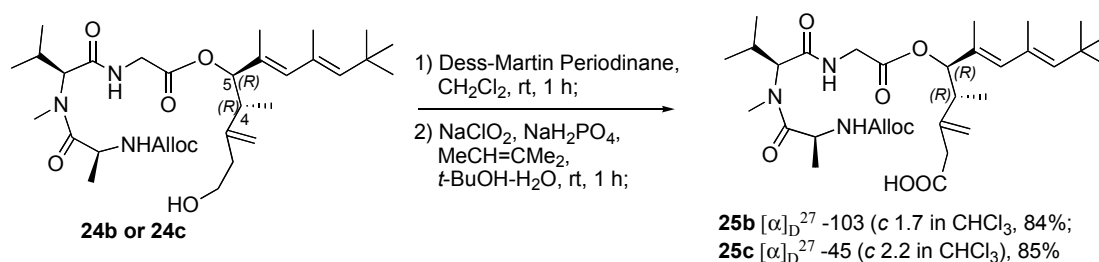

Dess-Martin periodinane oxidation: To a solution of Dess-Martin reagent (48 mg, 0.114 mmol) in anhydrous  $\text{CH}_2\text{Cl}_2$  (1 mL) was added dropwise of **24b** in  $\text{CH}_2\text{Cl}_2$  at 0 °C. The reaction mixture was stirred under nitrogen at 0 °C for 2h. After completion, the reaction mixture was diluted with ether and poured slowly into a  $\text{Na}_2\text{S}_2\text{O}_3:\text{NaHCO}_3$  (1:1) solution and stirred for 5 minutes and extract with ether. The combine etherate layer was washed with  $\text{NaHCO}_3$ , brine and dried over anhydrous  $\text{MgSO}_4$ . Concentration in *vacuo* provided the aldehyde and directly used for next step without purification.

The crude aldehyde was dissolved in a mixture of *t*-BuOH and 2-methyl-2-butene (3:1, 9 mL), and pH=4  $\text{NaH}_2\text{PO}_4$  water solution (3 mL) was added, followed by  $\text{NaClO}_2$  (9.3 mg, 0.084 mmol). The mixture was stirred at room temperature for half an hour, pour into ice-water and extracted with ethyl acetate (3x). The combine organic layer was washed with brine, dried over  $\text{MgSO}_4$  and concentrated. Purification through flash column chromatography provided **25b** (38.6 mg, 84%) as a colorless oil.

## 25b

$R_f$  0.02 (hexane/ethyl acetate, 1:1);

$[\alpha]_{\text{D}}^{27} -103$  (c 1.7 in  $\text{CHCl}_3$ );

# Supplementary Material (ESI) for Chemical Communications  
# This journal is (c) The Royal Society of Chemistry 2006

**<sup>1</sup>H NMR (500 MHz, CDCl<sub>3</sub>):** δ 0.83 (3H, d, *J* = 6.95 Hz, Val-CH<sub>3</sub>), 0.93 (3H, d, *J* = 7.4 Hz, C<sub>13</sub>-CH<sub>3</sub>), 0.94 (3H, d, *J* = 6.45 Hz, Val-CH<sub>3</sub>), 1.12 (9H, s, -C(CH<sub>3</sub>)<sub>3</sub>), 1.30 (3H, d, *J* = 6.95 Hz, Ala-CH<sub>3</sub>), 1.60 (3H, d, *J* = 1.4 Hz, C<sub>14</sub>-CH<sub>3</sub>), 1.77 (3H, d, *J* = 1.35 Hz, C<sub>15</sub>-CH<sub>3</sub>), 2.27 (1H, m, C<sub>4</sub>-H), 2.65 (1H, m, Val-(CH<sub>3</sub>)<sub>2</sub>CH), 3.13 (3H, s, N-CH<sub>3</sub>), 3.61 (1H, dd, *J* = 17.35, 3.70 Hz, Gly-CH<sub>2</sub>), 4.32 (1H, dd, *J* = 18.05, 7.85 Hz, Gly-CH<sub>2</sub>), 4.54 (2H, d, *J* = 4.65 Hz, CH<sub>2</sub>=CHCH<sub>2</sub>-), 4.71 (1H, d, *J* = 11.55 Hz, Val-α-H), 4.71 (1H, m, Ala-α-H), 5.03 (1H, s, C<sub>12</sub>-H), 5.07 (1H, s, C<sub>12</sub>-H), 5.10 (1H, d, *J* = 11.1 Hz, C<sub>5</sub>-H), 5.20 (1H, d, *J* = 10.15 Hz, CH<sub>2</sub>=CHCH<sub>2</sub>-), 5.27 (1H, d, *J* = 0.95 Hz, C<sub>9</sub>-H), 5.30 (1H, dd, *J* = 9, 1.4 Hz, CH<sub>2</sub>=CHCH<sub>2</sub>-), 5.60 (1H, d, *J* = 7.85 Hz, Ala-NH), 5.88 (1H, m, CH<sub>2</sub>=CHCH<sub>2</sub>-), 5.93 (1H, s, C<sub>7</sub>-H), 7.19 (1H, brs, *J* = 4.65 Hz, Gly-NH) ppm;

**<sup>13</sup>C NMR (125 MHz, CDCl<sub>3</sub>):** δ 12.4 (-CH<sub>3</sub>), 17.7 (-CH<sub>3</sub>), 18.1 (-CH<sub>3</sub>), 18.5 (-CH<sub>3</sub>), 19.3 (-CH<sub>3</sub>), 26.1 (-CH-(CH<sub>3</sub>)<sub>2</sub>), 26.3 (-CH<sub>3</sub>), 30.8 (-C(CH<sub>3</sub>)<sub>3</sub>), 30.9 (-CH<sub>3</sub>), 32.6 (-C(CH<sub>3</sub>)<sub>3</sub>), 40.2 (-CH<sub>2</sub>-), 41.3 (-CH-), 42.2 (-CH<sub>2</sub>-), 47.2 (-CH-), 62.8 (-CH-), 65.7 (-CH<sub>2</sub>-O-), 84.2 (-CH-O-), 114.8 (-C=CH<sub>2</sub>), 117.8 (-CH=CH<sub>2</sub>), 129.3 (-C=CH-), 130.3 (-C=CH-), 132.6 (-CH=CH<sub>2</sub>), 137.3 (-CH=C-), 141.3 (-CH=C-), 144.3 (-C=CH<sub>2</sub>-), 155.5 (-C=O), 167.9 (-C=O), 169.9 (-C=O), 174.5 (-C=O), 174.6 (-C=O) ppm;

**IR (neat, cm<sup>-1</sup>):** 3317, 3086, 2965, 2877, 1722, 1634, 1538, 1455, 1413;

**HRMS (ESI) m/z (M<sup>+</sup>+Na):** obsd 628.3562, calcd 628.3574 for C<sub>32</sub>H<sub>51</sub>NaN<sub>3</sub>O<sub>8</sub>.

## 25c

**R<sub>f</sub>** 0.02 (hexane/ethyl acetate, 1:1);

[α]<sub>D</sub><sup>27</sup> -45 (*c* 2.2 in CHCl<sub>3</sub>);

**<sup>1</sup>H NMR (500 MHz, CDCl<sub>3</sub>):** δ 0.83 (3H, d, *J* = 6.9 Hz, Val-CH<sub>3</sub>), 0.92 (3H, d, *J* = 6.9 Hz, C<sub>13</sub>-CH<sub>3</sub>), 0.97 (3H, d, *J* = 6 Hz, Val-CH<sub>3</sub>), 1.12 (9H, s, -C(CH<sub>3</sub>)<sub>3</sub>), 1.33 (3H, d, *J* = 6.45 Hz, Ala-CH<sub>3</sub>), 1.66 (3H, d, *J* = 1.4 Hz, C<sub>14</sub>-CH<sub>3</sub>), 1.78 (3H, d, *J* = 0.95 Hz, C<sub>15</sub>-CH<sub>3</sub>), 2.29 (1H, m, C<sub>4</sub>-H), 2.65 (1H, m, Val-(CH<sub>3</sub>)<sub>2</sub>CH), 3.07 (3H, s, N-CH<sub>3</sub>), 3.78 (1H, dd, *J* = 16.88, 4.6 Hz, Gly-CH<sub>2</sub>), 4.11 (1H, dd, *J* = 18.05, 6.45 Hz, Gly-CH<sub>2</sub>), 4.55 (2H, d, *J* = 4.65 Hz, CH<sub>2</sub>=CHCH<sub>2</sub>-), 4.66 (1H, d, *J* = 11.1 Hz, Val-α-H), 4.69 (1H, m, Ala-α-H), 5.04 (1H, s, C<sub>12</sub>-H), 5.07 (1H, s, C<sub>12</sub>-H), 5.12 (1H, d, *J* = 10.65 Hz, C<sub>5</sub>-H), 5.20 (1H, dd, *J* = 10.63, 1.4 Hz, CH<sub>2</sub>=CHCH<sub>2</sub>-), 5.28 (1H, d, *J* = 1.35 Hz, C<sub>9</sub>-H), 5.28 (1H, m, CH<sub>2</sub>=CHCH<sub>2</sub>-), 5.61 (1H, d, *J* = 7.4 Hz, Ala-NH), 5.88

(1H, m, CH<sub>2</sub>=CHCH<sub>2</sub>-), 5.93 (1H, s, C<sub>7</sub>-H), 6.97 (1H, brt, *J* = 5.05 Hz, Gly-NH) ppm;

<sup>13</sup>C NMR (125 MHz, CDCl<sub>3</sub>): δ 12.4 (-CH<sub>3</sub>), 17.9 (-CH<sub>3</sub>), 18.4 (-CH<sub>3</sub>), 19.5 (-CH<sub>3</sub>), 19.6 (-CH<sub>3</sub>), 25.8 (-CH-(CH<sub>3</sub>)<sub>2</sub>), 25.9 (-CH<sub>3</sub>), 30.8 (-C(CH<sub>3</sub>)<sub>3</sub>), 30.9 (-CH<sub>3</sub>), 32.6 (-C(CH<sub>3</sub>)<sub>3</sub>), 40.8 (-CH<sub>2</sub>-), 41.4 (-CH<sub>2</sub>-), 41.4 (-CH-), 47.2 (-CH-), 63.0 (-CH-), 65.7 (-CH<sub>2</sub>-O-), 83.8 (-CH-O-), 115.1 (-C=CH<sub>2</sub>), 117.7 (-CH=CH<sub>2</sub>), 129.4 (-C=CH-), 130.4 (-C=CH-), 132.6 (-CH=CH<sub>2</sub>), 137.1 (-CH=C-), 141.3 (-CH=C-), 144.0 (-C=CH<sub>2</sub>-), 155.5 (-C=O), 167.8 (-C=O), 169.5 (-C=O), 174.1 (-C=O), 174.7 (-C=O) ppm;

IR (neat, cm<sup>-1</sup>): 3317, 3086, 2965, 2877, 1722, 1634, 1538, 1455, 1413;

HRMS (ESI) *m/z* (M<sup>+</sup>+Na): obsd 628.3562, calcd 628.3574 for C<sub>32</sub>H<sub>51</sub>NaN<sub>3</sub>O<sub>8</sub>.

### (4*R*,5*R*)-antillatoxin (1b)

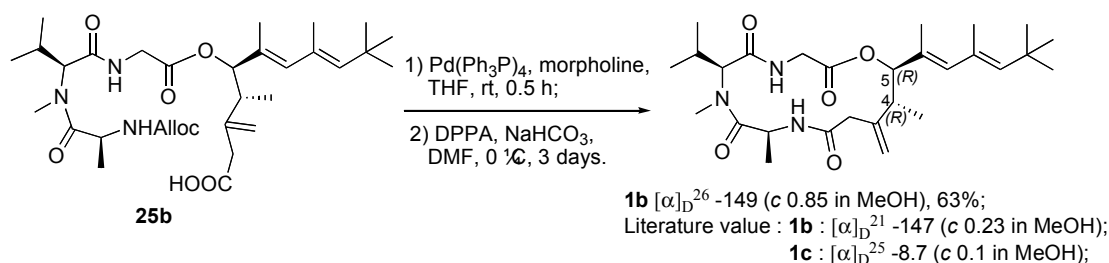

To a solution of the acid **25b** (78 mg, 0.128 mmol) in 1 mL THF was added morpholine (0.11 mL, 1.28 mmol) and Pd(PPh<sub>3</sub>)<sub>4</sub> (15 mg, 0.015 mmol). After stirring for 30 min at room temperature, the mixture was diluted with pH=6 buffer solution and extracted with CHCl<sub>3</sub> (x3). The combine organic extract was dried (Na<sub>2</sub>SO<sub>4</sub>), filtered and concentrated to afford the crude amino acid.

The crude amino acid was dissolved in DMF (50 mL) and cooled to 0 °C. NaHCO<sub>3</sub> (50 mg, 0.706 mmol) and DPPA (72 μL, 0.321 mmol) were added, the mixture solution was stirred at 0 °C for 3 days. The solution was diluted with ethyl acetate, wash with KHSO<sub>4</sub> solution, H<sub>2</sub>O, NaHCO<sub>3</sub> and brine. The organic layer was dried (Na<sub>2</sub>SO<sub>4</sub>), filtered and concentrated. The crude product was purified by flash chromatography on silica gel (Hexane/ethyl acetate, 5:1 to 2:1) to give the desired product **1b** (40.7 mg, 63%) as a colorless oil.

### (4*R*, 5*R*)-antillatoxin (1b)

*R<sub>f</sub>* 0.62 (hexane/ethyl acetate, 1:1);

[α]<sub>D</sub><sup>26</sup> -149 (c 0.85 in MeOH);



# Supplementary Material (ESI) for Chemical Communications  
# This journal is (c) The Royal Society of Chemistry 2006

**<sup>1</sup>H NMR (500 MHz, CDCl<sub>3</sub>):** δ 0.85 (3H, d, *J* = 6.95 Hz, Val-CH<sub>3</sub>), 0.86 (3H, d, *J* = 7.4 Hz, C<sub>13</sub>-CH<sub>3</sub>), 0.96 (3H, d, *J* = 6.05 Hz, Val-CH<sub>3</sub>), 1.11 (9H, s, -C(CH<sub>3</sub>)<sub>3</sub>), 1.40 (3H, d, *J* = 6.5 Hz, Ala-CH<sub>3</sub>), 1.54 (3H, d, *J* = 1.4 Hz, C<sub>14</sub>-CH<sub>3</sub>), 1.77 (3H, d, *J* = 1.4 Hz, C<sub>15</sub>-CH<sub>3</sub>), 2.17 (1H, m, C<sub>4</sub>-H), 2.42 (1H, m, Val-(CH<sub>3</sub>)<sub>2</sub>CH), 2.83 (1H, d, *J* = 13.4 Hz, C<sub>2</sub>-H), 2.85 (3H, s, N-CH<sub>3</sub>), 2.97 (1H, d, *J* = 12.95 Hz, C<sub>2</sub>-H), 3.47 (1H, dd, *J* = 18.28, 1.4 Hz, Gly-CH<sub>2</sub>), 4.25 (1H, d, *J* = 11.05 Hz, Val-α-H), 4.67 (1H, dd, *J* = 18.28, 9.92 Hz, Gly-CH<sub>2</sub>), 4.99 (1H, s, C<sub>12</sub>-H), 5.04 (1H, s, C<sub>12</sub>-H), 5.16 (1H, d, *J* = 11.1 Hz, C<sub>5</sub>-H), 5.28 (1H, s, C<sub>9</sub>-H), 5.33 (1H, m, Ala-α-H), 5.92 (1H, s, C<sub>7</sub>-H), 6.76 (1H, d, *J* = 9.25 Hz, Ala-NH), 7.96 (1H, d, *J* = 9.25 Hz, Gly-NH) ppm;

**<sup>13</sup>C NMR (125 MHz, CDCl<sub>3</sub>):** δ 12.4 (-CH<sub>3</sub>), 17.7 (-CH<sub>3</sub>), 18.5 (-CH<sub>3</sub>), 18.6 (-CH<sub>3</sub>), 18.9 (-CH<sub>3</sub>), 19.3 (-CH<sub>3</sub>), 26.1 (-CH(CH<sub>3</sub>)<sub>2</sub>), 28.7 (-CH<sub>3</sub>), 30.8 (-C(CH<sub>3</sub>)<sub>3</sub>), 32.6 (-C(CH<sub>3</sub>)<sub>3</sub>), 38.9 (-CH-), 41.1 (-CH<sub>2</sub>-), 43.0 (-CH-), 46.5 (-CH<sub>2</sub>-), 67.1 (-CH-), 83.4 (-CH-O-), 113.7 (-C=CH<sub>2</sub>), 129.1 (-C=CH-), 130.4 (-C=CH-), 137.2 (-CH=C-), 141.4 (-CH=C-), 144.8 (-C=CH<sub>2</sub>-), 167.6 (-C=O), 167.8 (-C=O), 171.0 (-C=O), 173.1 (-C=O) ppm;

**IR (neat, cm<sup>-1</sup>):** 3304, 1744, 1682, 1622, 1547;

**HRMS (ESI) m/z [(M+Na)<sup>+</sup>]:** obsd 526.3258, calcd 526.3257 for C<sub>28</sub>H<sub>45</sub>N<sub>3</sub>O<sub>5</sub>Na.

#### **(4*S*, 5*S*)-antillatoxin (1c)**

[α]<sub>D</sub><sup>25</sup> -8.7 (*c* 0.1 in MeOH);

**<sup>1</sup>H NMR (CDCl<sub>3</sub>, 500 MHz):** δ 0.85 (3H, d, *J* = 7.0 Hz, Val-CH<sub>3</sub>), 0.90 (3H, d, *J* = 7.0 Hz, C<sub>13</sub>-CH<sub>3</sub>), 0.95 (3H, m, Val-CH<sub>3</sub>), 0.99 (1H, d, *J* = 6.7 Hz, C<sub>4</sub>-H), 1.14 (9H, s, -C(CH<sub>3</sub>)<sub>3</sub>), 1.38 (3H, d, *J* = 6.7 Hz, Ala-CH<sub>3</sub>), 1.78 (3H, s, C<sub>14</sub>-CH<sub>3</sub>), 1.88 (3H, s, C<sub>15</sub>-CH<sub>3</sub>), 2.40 (1H, m, Val-(CH<sub>3</sub>)<sub>2</sub>CH), 2.86 (3H, s, N-CH<sub>3</sub>), 3.00 (1H, m, C<sub>2</sub>-H), 3.15 (1H, m, C<sub>2</sub>-H), 3.94 (1H, dd, *J* = 10.4, 7.3 Hz, Gly-CH<sub>2</sub>), 4.03 (1H, dd, *J* = 17.4, 4.6 Hz, Val-α-H), 4.52 (1H, d, *J* = 11.3 Hz, Gly-CH<sub>2</sub>), 4.89 (1H, s, C<sub>12</sub>-H), 4.93 (1H, s, C<sub>9</sub>-H), 5.21 (2H, m, C<sub>5</sub>-H, C<sub>12</sub>-H), 5.32 (1H, m, Ala-α-H), 6.01 (1H, s, C<sub>7</sub>-H), 6.52 (1H, d, *J* = 10.1 Hz, Ala-NH), 7.54 (1H, br, Gly-NH) ppm.

**<sup>13</sup>C NMR (125 MHz, CDCl<sub>3</sub>):** δ 12.9 (-CH<sub>3</sub>), 17.8 (-CH<sub>3</sub>), 18.3 (-CH<sub>3</sub>), 18.5 (-CH<sub>3</sub>), 19.3 (-CH<sub>3</sub>), 26.5 (-CH<sub>3</sub>), 29.1 (-CH-(CH<sub>3</sub>)<sub>2</sub>), 29.7 (-CH<sub>3</sub>), 30.9 (-C(CH<sub>3</sub>)<sub>3</sub>), 34.2 (-C(CH<sub>3</sub>)<sub>3</sub>), 40.6 (-CH-), 42.9 (-CH<sub>2</sub>-), 43.2 (-CH-), 43.5 (-CH<sub>2</sub>-), 65.9 (-CH-), 83.7 (-CH-O-), 105.3 (-C=CH<sub>2</sub>), 129.4 (-C=CH-), 130.4 (-CH=C-), 136.8 (-C=CH-), 141.3

# Supplementary Material (ESI) for Chemical Communications

# This journal is (c) The Royal Society of Chemistry 2006

(-CH=C-), 146.0 (-C=CH<sub>2</sub>-), 166.4 (-C=O), 168.2 (-C=O), 171.6 (-C=O), 172.7 (-C=O) ppm.

**IR (neat, cm<sup>-1</sup>):** 3304, 1744, 1682, 1622, 1547;

**HRMS (ESI) m/z [(M+Na)<sup>+</sup>]:** obsd 526.3258, calcd 526.3257 for C<sub>28</sub>H<sub>45</sub>N<sub>3</sub>O<sub>5</sub>Na.
